# Supplementary material for: Pyrenosetin D, a New Pentacyclic Decalinoyltetramic Acid Derivative from the Algicolous Fungus Pyrenochaetopsis sp. FVE-087
Source: PubMed Central journal article supplement (PMC7344976; doi:10.3390/md18060281), 2020-05-26
Supplement: marinedrugs-18-00281-s001.pdf [file marinedrugs-18-00281-s001.pdf]

## Supporting Information

# Pyrenosetin D, a New Pentacyclic Decalinoyltetramic Acid Derivative from the Algicolous Fungus *Pyrenochaetopsis* sp. FVE-087

Bicheng Fan <sup>1</sup>, Pradeep Dewapriya <sup>1</sup>, Fengjie Li <sup>1</sup>, Laura Grauso <sup>2</sup>, Martina Blümel <sup>1</sup>, Alfonso Mangoni <sup>3</sup>, and Deniz Tasdemir <sup>1,4\*</sup>

<sup>1</sup> GEOMAR Centre for Marine Biotechnology (GEOMAR-Biotech), Research Unit Marine Natural Products Chemistry, GEOMAR Helmholtz Centre for Ocean Research Kiel, Am Kiel-Kanal 44, 24106 Kiel, Germany; bfan@geomar.de (B.F.); pdewapriya@geomar.de (P.D.); fli@geomar.de (F. L.); mbluemel@geomar.de (M.B.)

<sup>2</sup> Dipartimento di Agraria, Università degli Studi di Napoli Federico II, via Università 100, 80055 Portici (NA), Italy; laura.grauso@unina.it (L.G.)

<sup>3</sup> Dipartimento di Farmacia, Università degli Studi di Napoli Federico II, via Domenico Montesano 49, 80131 Napoli, Italy; alfonso.mangoni@unina.it (A.M.)

<sup>4</sup> Faculty of Mathematics and Natural Sciences, Kiel University, Christian-Albrechts-Platz 4, 24118 Kiel, Germany

\* Correspondence: dtasdemir@geomar.de; Tel.: +49-431-600-4430

### List of Figures:

**Figure S1.** Molecular phylogenetic analysis of *Pyrenochaetopsis* sp. FVE-087 by maximum likelihood method

**Figure S2.** Structures of compounds **1**, 3'-*epi*-**1**, and 5'-*epi*-**1**

**Figure S3.** Error of scaled predicted chemical shifts compared to experimental chemical shifts

**Figure S4.** <sup>1</sup>H NMR spectrum of compound **1** (600 MHz, CD<sub>3</sub>CN)

**Figure S5.** <sup>13</sup>C NMR spectrum of compound **1** (150 MHz, CD<sub>3</sub>CN)

**Figure S6.** DEPT-HSQC spectrum of compound **1** (600 MHz, CD<sub>3</sub>CN)

**Figure S7.** COSY spectrum of compound **1** (600 MHz, CD<sub>3</sub>CN)

**Figure S8.** HMBC spectrum of compound **1** (600 MHz, CD<sub>3</sub>CN)

**Figure S9.** NOESY spectrum of compound **1** (600 MHz, CD<sub>3</sub>CN)

**Figure S10.** HR-ESIMS spectrum of compound **1**

**Figure S11.** FT-IR spectrum of compound **1**

### **List of Tables:**

**Table S1.** Cartesian coordinates, energies, population at 298 K, and calculated optical rotations of significantly populated conformers of compound **1**. Conformers were optimized at the B3LYP/TZVP/SMD(ACN) level; optical rotation were calculated at the B3LYP/TZVP/SMD(MeOH) level

**Table S2.** Cartesian coordinates, energies, and population at 298 K of significantly populated conformers of compound *5'-epi-1*. Conformers were optimized at the B3LYP/TZVP/SMD(ACN) level

**Table S3.** Isotropic shieldings of significantly populated conformers of compound **1**, average isotropic shieldings over conformers, linearly scaled calculated chemical shifts, experimental chemical shifts, and errors

**Table S4.** Isotropic shieldings of significantly populated conformers of compound *5'-epi-1*, average isotropic shieldings over conformers, linearly scaled calculated chemical shifts, experimental chemical shifts, and errors

**Table S5.** Selected coupling constants of compounds **1** and *5'-epi-1* calculated at the B3LYP/6-31G(d,p) level and relative intensities of the corresponding HMPC peaks

**Table S6.** Bioactivity of Kupchan subextracts (KM, KC, KH) and C18 SPE fractions (F0-F10) obtained from *Pyrenochaetopsis* FVE-087 against cancer cell lines (A-375, A-549, HT-29, HCT-116, MB-231) and HaCaT cells. The activity is expressed as % inhibition at 100 µg/mL test concentration. Reference compound: Doxorubicin.

**Figure S1.** Molecular phylogenetic analysis of *Pyrenochaetopsis* sp. FVE-087 by maximum likelihood method

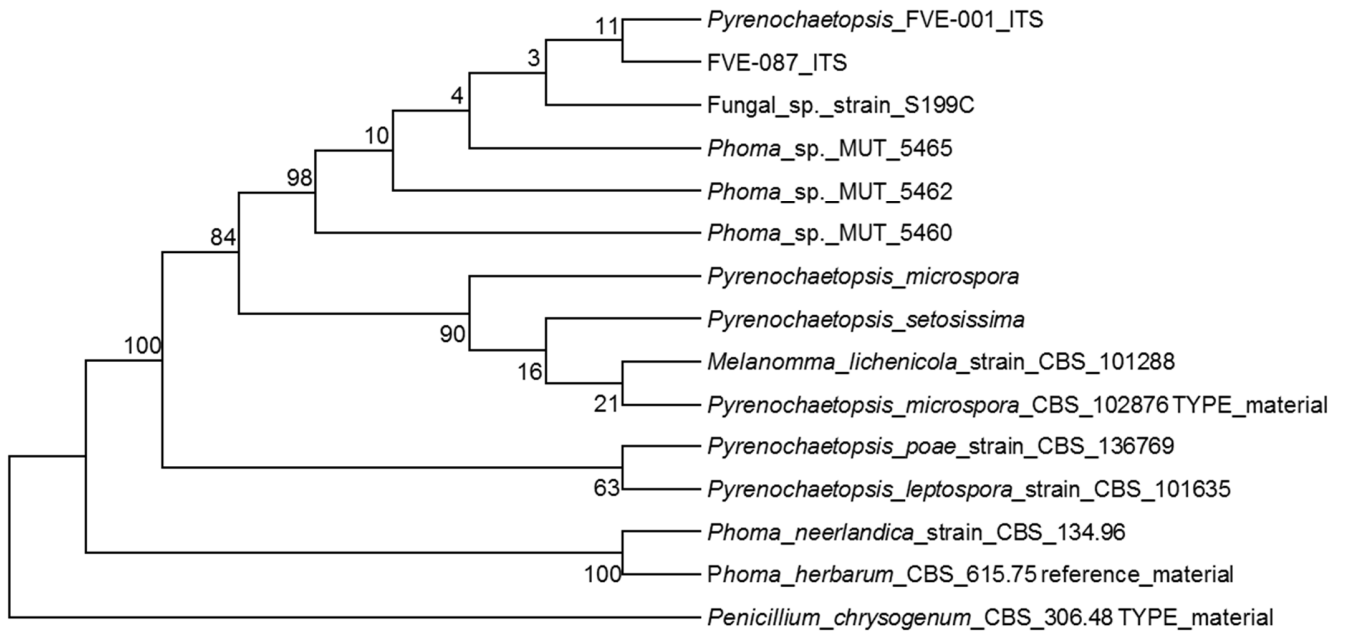

**Figure S2.** Structures of compounds **1**, *3'-epi-1*, and *5'-epi-1*.

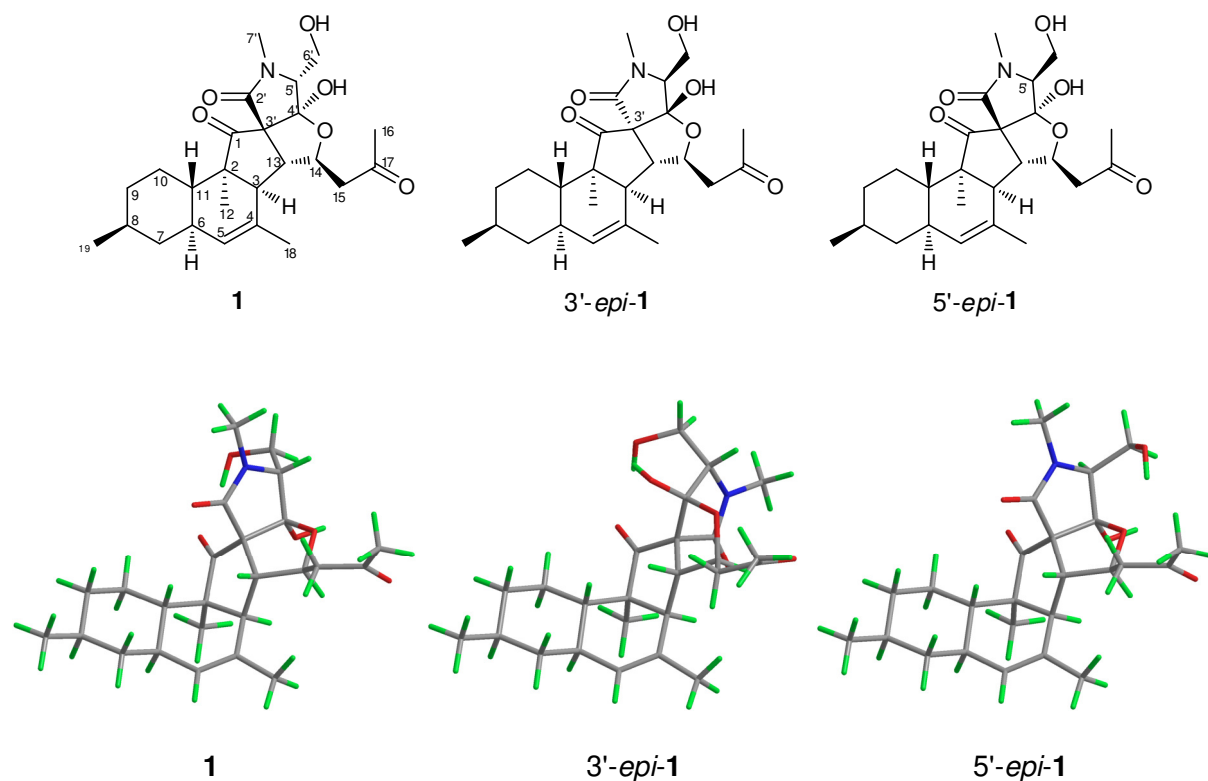

**Figure S3.** (A) Errors of predicted  $^{13}\text{C}$  chemical shifts of compounds **1** and *5'-epi-1*. (B) Errors of predicted  $^1\text{H}$  chemical shifts of compounds **1** and *5'-epi-1*.

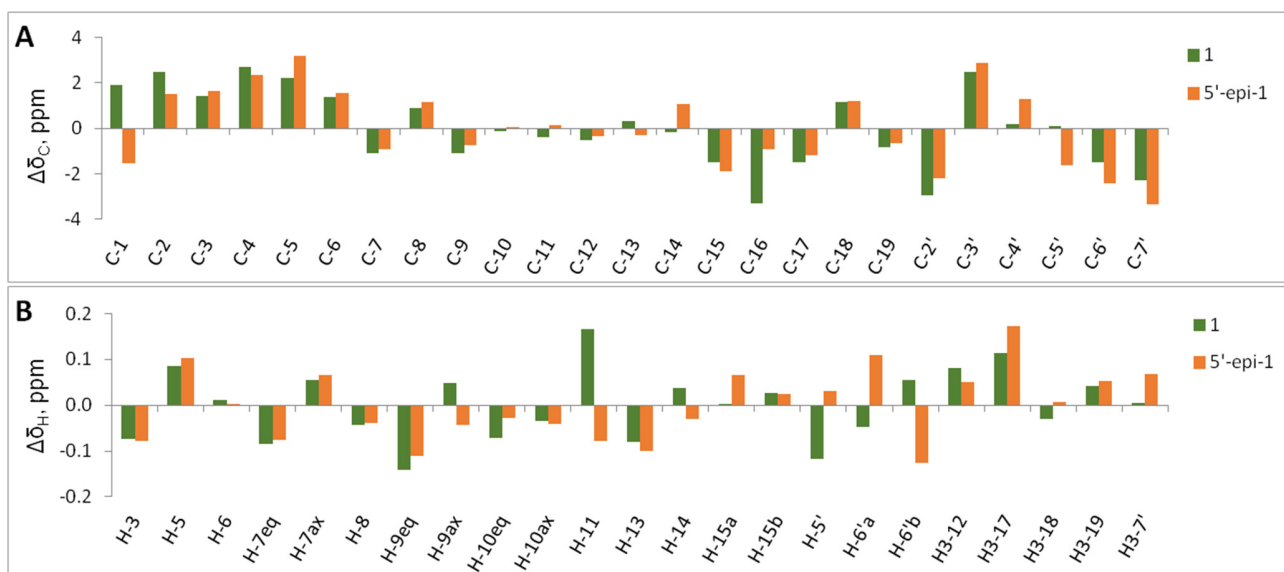

**Figure S4.**  $^1\text{H}$  NMR spectrum of compound **1** (600 MHz,  $\text{CD}_3\text{CN}$ )

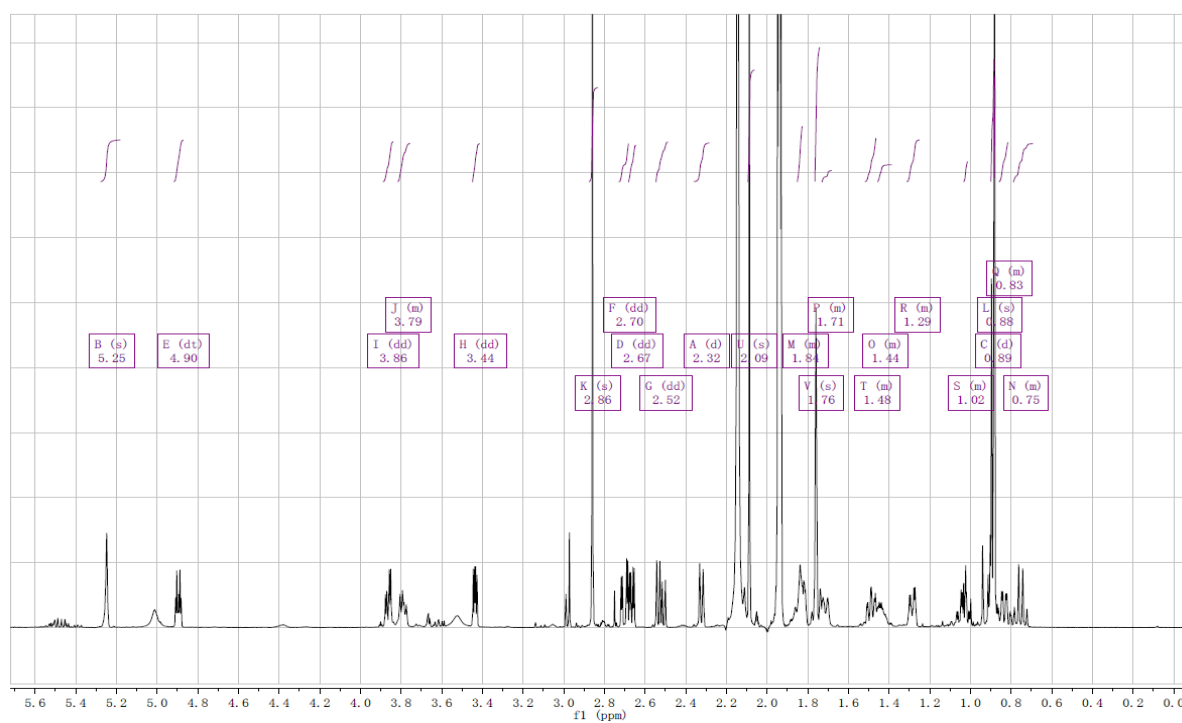

**Figure S5.**  $^{13}\text{C}$  NMR spectrum of compound **1** (150 MHz,  $\text{CD}_3\text{CN}$ )

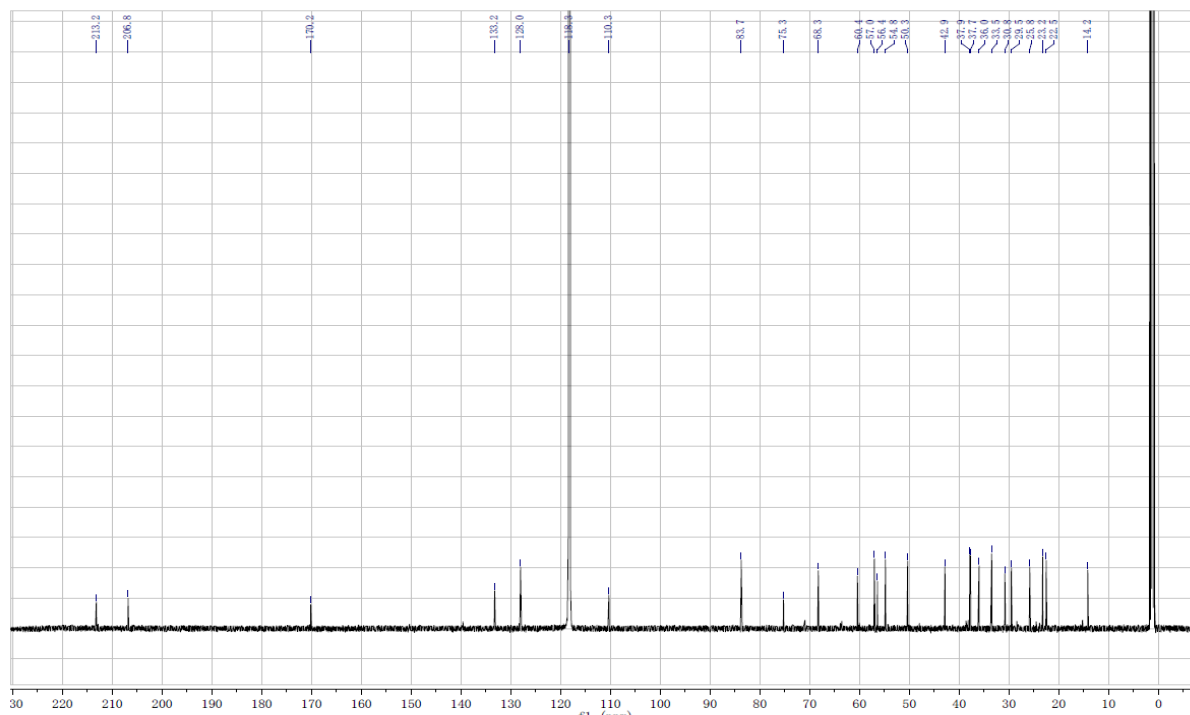

Figure S6. DEPT-HSQC spectrum of compound 1 (600 MHz, CD<sub>3</sub>CN).

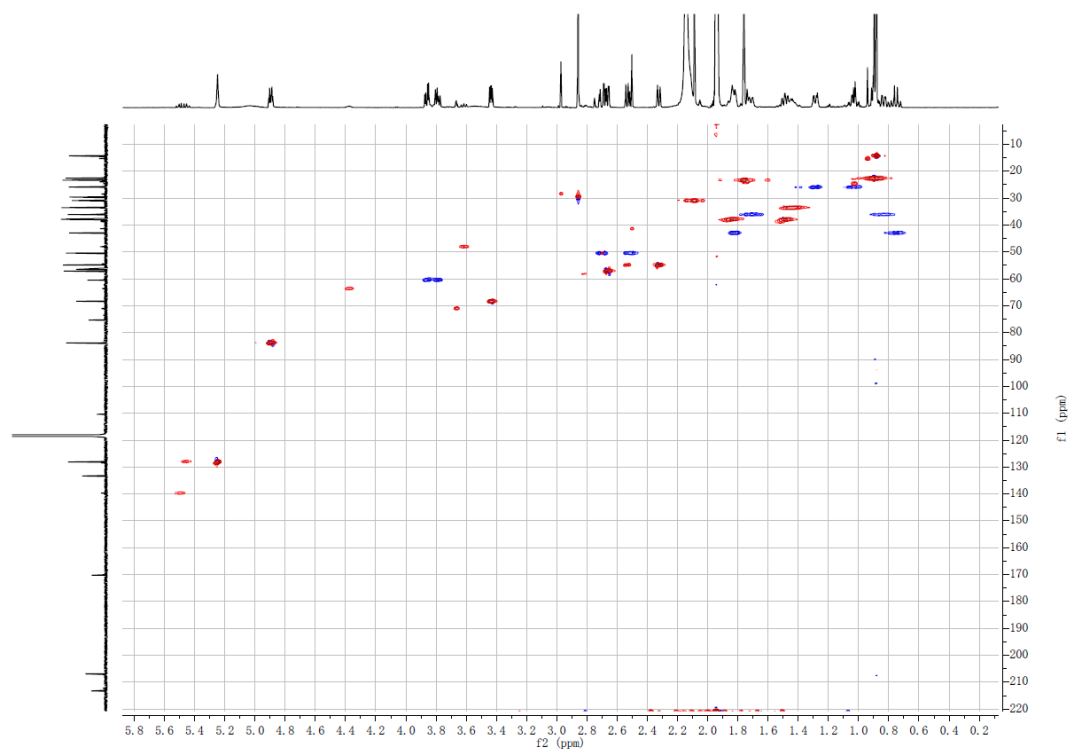

Figure S7. COSY spectrum of compound 1 (600 MHz, CD<sub>3</sub>CN)

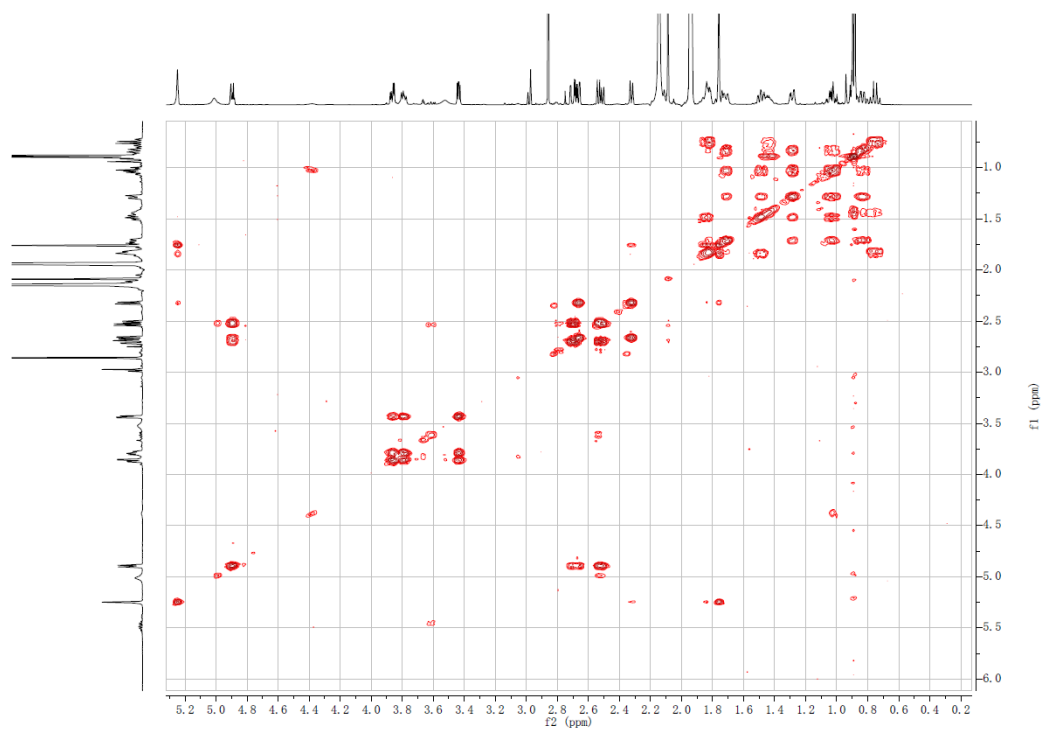

**Figure S8.** HMBC spectrum of compound 1 (600 MHz, CD<sub>3</sub>CN)

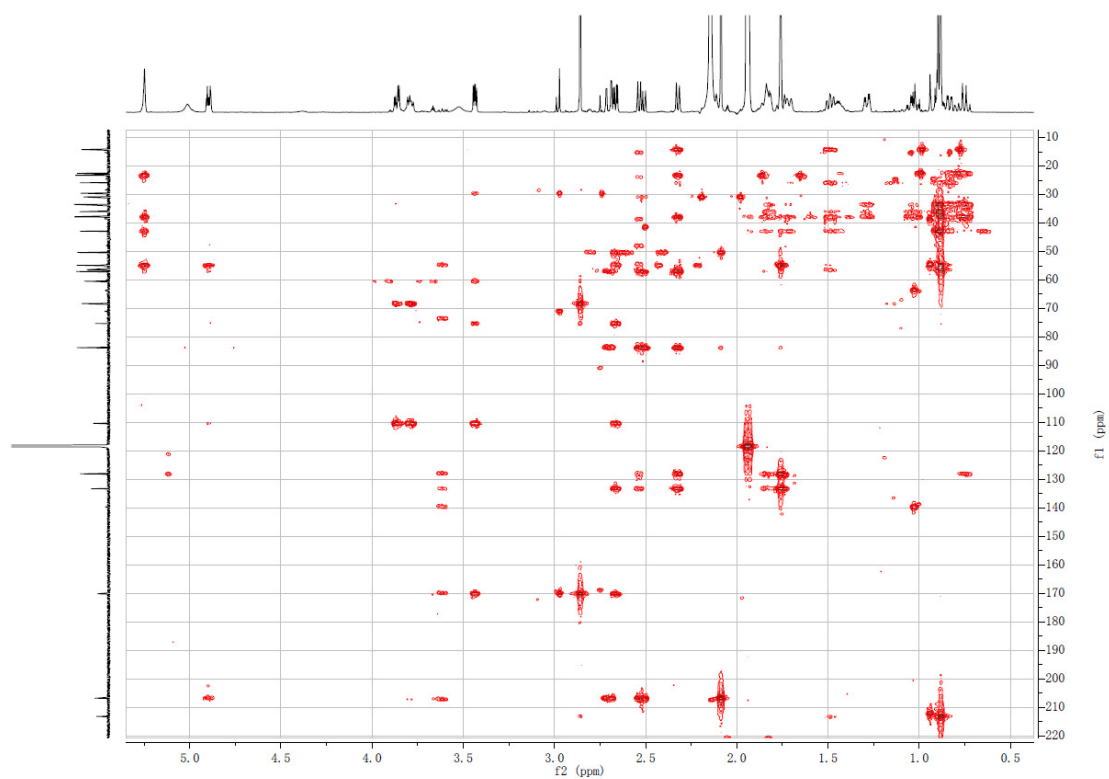

**Figure S9.** NOESY spectrum of compound 1 (600 MHz, CD<sub>3</sub>CN)

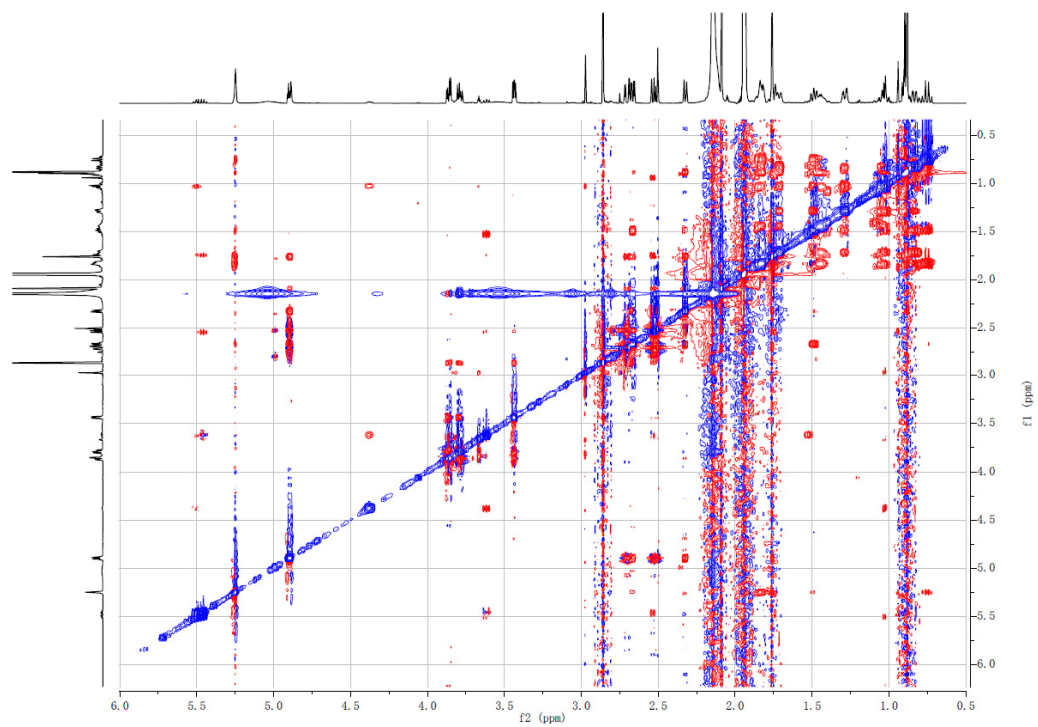

**Figure S10.** HR-ESIMS spectrum of compound **1**

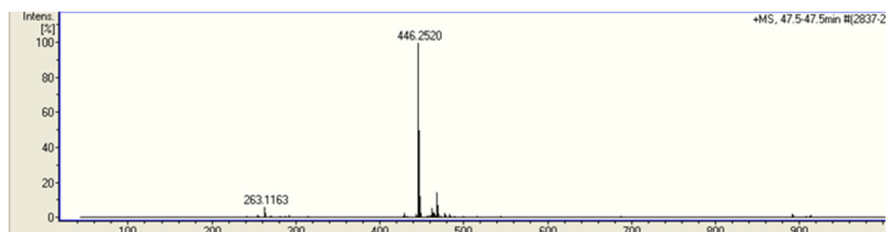

**Figure S11.** FT-IR spectrum of compound **1**

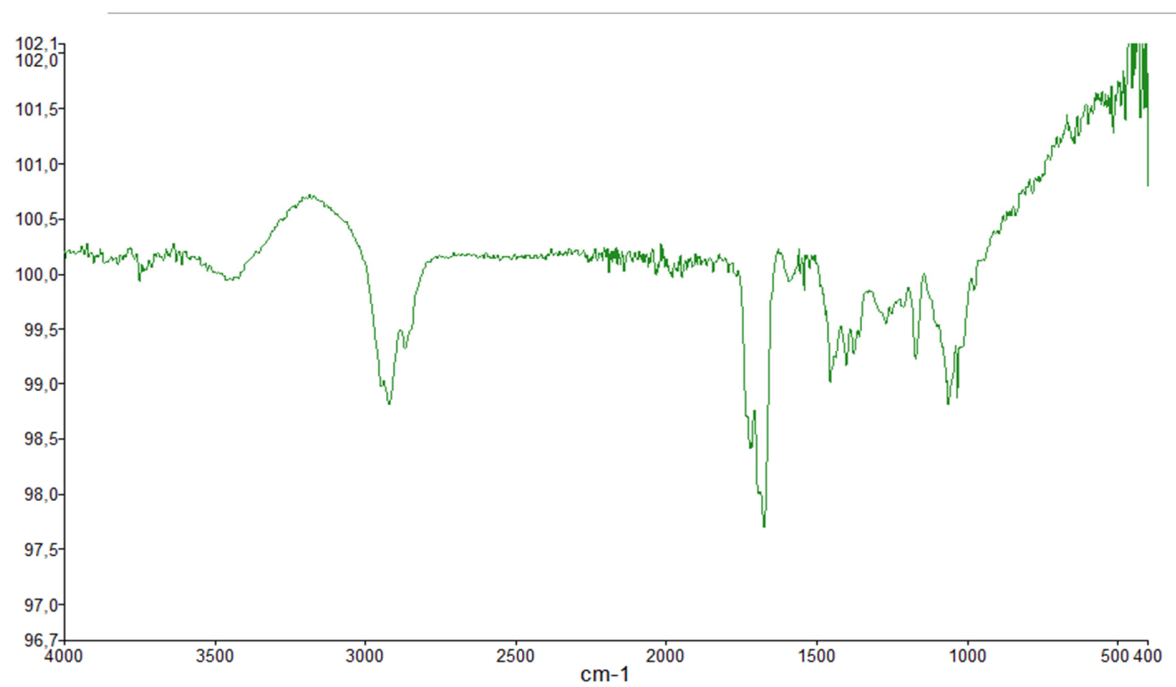



**Table S1.** Cartesian coordinates, energies, population at 298 K, and calculated optical rotations of significantly populated conformers of compound 1. Conformers were optimized at the B3LYP/TZVP/SMD(ACN) level; optical rotation were calculated at the B3LYP/TZVP/SMD(MeOH) level.

| Conformer 1                      |          |          |          | Conformer 2                      |          |          |          | Conformer 3                      |          |          |          |
|----------------------------------|----------|----------|----------|----------------------------------|----------|----------|----------|----------------------------------|----------|----------|----------|
| Relative energy (kcal/mol)       |          | 0.00     |          | Relative energy (kcal/mol)       |          | 0.65     |          | Relative energy (kcal/mol)       |          | 0.74     |          |
| Population (%)                   |          | 38.7     |          | Population (%)                   |          | 13.0     |          | Population (%)                   |          | 11.1     |          |
| Calcd. [ $\alpha$ ] <sub>D</sub> |          | -98.0    |          | Calcd. [ $\alpha$ ] <sub>D</sub> |          | -152.0   |          | Calcd. [ $\alpha$ ] <sub>D</sub> |          | -60.4    |          |
| C                                | 0.37784  | -1.20880 | -0.98624 | C                                | 0.37737  | -1.34617 | -0.78471 | C                                | 0.35542  | -1.14535 | -1.01927 |
| C                                | 1.33882  | -0.08551 | -1.33146 | C                                | 1.37491  | -0.30065 | -1.27162 | C                                | 1.33359  | -0.02559 | -1.32422 |
| C                                | 0.45876  | 1.18190  | -1.15193 | C                                | 0.56788  | 1.02286  | -1.17951 | C                                | 0.48067  | 1.24912  | -1.07753 |
| C                                | 1.24501  | 2.45527  | -0.93746 | C                                | 1.41977  | 2.26895  | -1.09615 | C                                | 1.29449  | 2.49540  | -0.81247 |
| C                                | 2.53958  | 2.42724  | -0.61405 | C                                | 2.72472  | 2.20334  | -0.82419 | C                                | 2.59215  | 2.42770  | -0.50819 |
| C                                | 3.35147  | 1.18120  | -0.41803 | C                                | 3.48534  | 0.93837  | -0.55724 | C                                | 3.38191  | 1.15875  | -0.38199 |
| C                                | 4.32704  | 1.29607  | 0.76509  | C                                | 4.51929  | 1.10627  | 0.56884  | C                                | 4.37750  | 1.20042  | 0.78932  |
| C                                | 5.21728  | 0.05475  | 0.90231  | C                                | 5.35369  | -0.16229 | 0.78398  | C                                | 5.24396  | -0.06322 | 0.85540  |
| C                                | 4.35852  | -1.21443 | 0.97161  | C                                | 4.43776  | -1.37302 | 1.00300  | C                                | 4.36028  | -1.31658 | 0.88309  |
| C                                | 3.35848  | -1.31982 | -0.18571 | C                                | 3.38476  | -1.52863 | -0.10000 | C                                | 3.34058  | -1.35035 | -0.26141 |
| C                                | 2.47423  | -0.06913 | -0.25011 | C                                | 2.55732  | -0.24590 | -0.24396 | C                                | 2.48191  | -0.08034 | -0.25754 |
| C                                | 1.86943  | -0.24438 | -2.75773 | C                                | 1.83571  | -0.61807 | -2.69606 | C                                | 1.84483  | -0.12901 | -2.76270 |
| C                                | -0.55980 | 0.83623  | -0.01905 | C                                | -0.43369 | 0.83119  | 0.00427  | C                                | -0.53360 | 0.87107  | 0.04871  |
| C                                | -1.98247 | 1.41987  | -0.18158 | C                                | -1.81931 | 1.49899  | -0.16331 | C                                | -1.94702 | 1.48727  | -0.06764 |
| C                                | -2.45554 | 2.27802  | 0.97645  | C                                | -2.21757 | 2.42274  | 0.97299  | C                                | -2.39456 | 2.27987  | 1.15445  |
| C                                | -3.77482 | 2.99401  | 0.74569  | C                                | -3.50296 | 3.19879  | 0.74446  | C                                | -3.81767 | 2.80414  | 1.09308  |
| C                                | -4.51511 | 3.42281  | 1.98304  | C                                | -4.22431 | 3.65889  | 1.98177  | C                                | -4.23732 | 3.57082  | -0.13357 |
| C                                | 0.51531  | 3.75152  | -1.15882 | C                                | 0.74028  | 3.57998  | -1.38200 | C                                | 0.58697  | 3.81391  | -0.96099 |
| C                                | 6.15879  | 0.16582  | 2.10008  | C                                | 6.35140  | 0.00623  | 1.92836  | C                                | 6.20706  | -0.02508 | 2.04055  |
| C                                | -0.84124 | -1.41805 | 1.24444  | C                                | -0.89885 | -1.31350 | 1.40301  | C                                | -0.85371 | -1.43353 | 1.20845  |
| C                                | -0.75917 | -0.68759 | -0.10454 | C                                | -0.73838 | -0.67206 | 0.02261  | C                                | -0.76521 | -0.64284 | -0.10595 |
| C                                | -2.18283 | -0.87773 | -0.67354 | C                                | -2.16172 | -0.79884 | -0.57539 | C                                | -2.19456 | -0.78054 | -0.67527 |
| C                                | -2.80892 | -2.07556 | 0.08954  | C                                | -2.85945 | -1.92895 | 0.21799  | C                                | -2.84053 | -1.99858 | 0.03727  |
| C                                | -2.88131 | -3.41574 | -0.65426 | C                                | -2.94460 | -3.26561 | -0.52439 | C                                | -2.94570 | -3.30142 | -0.76670 |
| C                                | -2.37211 | -2.93405 | 2.43375  | C                                | -2.54761 | -2.68736 | 2.61863  | C                                | -2.40826 | -2.97090 | 2.33776  |
| H                                | -0.12109 | 1.30449  | -2.07339 | H                                | -0.03405 | 1.09814  | -2.09214 | H                                | -0.10452 | 1.42561  | -1.98690 |
| H                                | 3.07329  | 3.36918  | -0.50804 | H                                | 3.30456  | 3.12376  | -0.81325 | H                                | 3.14495  | 3.35345  | -0.36446 |
| H                                | 3.97157  | 1.04415  | -1.31573 | H                                | 4.05524  | 0.69293  | -1.46507 | H                                | 3.98576  | 1.05097  | -1.29458 |
| H                                | 4.95028  | 2.18666  | 0.63544  | H                                | 5.17841  | 1.94799  | 0.33302  | H                                | 5.01669  | 2.08356  | 0.69002  |
| H                                | 3.75698  | 1.44097  | 1.69102  | H                                | 3.99978  | 1.36335  | 1.50027  | H                                | 3.82481  | 1.31404  | 1.73000  |
| H                                | 5.83037  | -0.00954 | -0.00608 | H                                | 5.92244  | -0.34017 | -0.13806 | H                                | 5.84074  | -0.09894 | -0.06535 |
| H                                | 5.00535  | -2.09702 | 0.98169  | H                                | 5.04061  | -2.28398 | 1.06915  | H                                | 4.98849  | -2.21169 | 0.84363  |
| H                                | 2.75047  | -2.21773 | -0.05821 | H                                | 2.74056  | -2.37921 | 0.12962  | H                                | 2.71567  | -2.24031 | -0.16344 |
| H                                | 3.90434  | -1.43933 | -1.12652 | H                                | 3.88378  | -1.75770 | -1.04665 | H                                | 3.86959  | -1.43970 | -1.21506 |
| H                                | 1.97802  | 0.02137  | 0.72247  | H                                | 2.11040  | -0.04308 | 0.73627  | H                                | 1.99982  | -0.02327 | 0.72473  |
| H                                | -0.13990 | 1.10696  | 0.94886  | H                                | 0.03535  | 1.13788  | 0.93867  | H                                | -0.09989 | 1.08856  | 1.02385  |
| H                                | -2.06179 | 1.98174  | -1.11336 | H                                | -1.87302 | 2.03912  | -1.10999 | H                                | -2.01649 | 2.10286  | -0.96658 |
| H                                | -2.51088 | 1.68464  | 1.89221  | H                                | -2.27928 | 1.86723  | 1.91159  | H                                | -2.29231 | 1.67150  | 2.05402  |
| H                                | -1.71996 | 3.06696  | 1.17065  | H                                | -1.43670 | 3.17899  | 1.11597  | H                                | -1.73835 | 3.15047  | 1.25686  |
| H                                | -3.83546 | -1.80564 | 0.35429  | H                                | -3.87411 | -1.60745 | 0.47296  | H                                | -3.85966 | -1.72039 | 0.32126  |
| H                                | 3.80935  | -1.21881 | 1.92105  | H                                | 3.93099  | -1.26313 | 1.96969  | H                                | 3.82600  | -1.35190 | 1.84033  |
| H                                | -3.53414 | -4.08251 | -0.08734 | H                                | -1.96150 | -3.56818 | -0.88199 | H                                | -3.60765 | -3.97995 | -0.22496 |
| H                                | -3.36820 | -3.24042 | -1.62118 | H                                | -3.32557 | -4.04035 | 0.14355  | H                                | -3.43720 | -3.07330 | -1.72033 |
| H                                | -3.06706 | -0.99854 | -2.39789 | H                                | -2.88286 | -1.56220 | -2.20896 | H                                | -3.09080 | -0.83832 | -2.39739 |
| H                                | -0.95802 | -3.48604 | -1.11486 | H                                | -4.70422 | -3.08324 | -1.39746 | H                                | -1.02698 | -3.38904 | -1.24375 |
| H                                | 2.43069  | -1.17081 | -2.87490 | H                                | 0.97986  | -0.64703 | -3.37356 | H                                | 1.00842  | -0.10117 | -3.46401 |
| H                                | 1.04130  | -0.26202 | -3.46914 | H                                | 2.52603  | 0.14149  | -3.06432 | H                                | 2.50812  | 0.70257  | -3.00120 |
| H                                | 2.52197  | 0.58669  | -3.02585 | H                                | 2.33441  | -1.58561 | -2.74710 | H                                | 2.38910  | -1.05817 | -2.92803 |
| H                                | -3.83573 | 3.90313  | 2.69138  | H                                | -3.52488 | 4.11319  | 2.68792  | H                                | -5.18898 | 4.06871  | 0.04471  |
| H                                | -4.91523 | 2.53372  | 2.48053  | H                                | -4.65775 | 2.78704  | 2.48192  | H                                | -4.35030 | 2.88327  | -0.97655 |
| H                                | -5.33387 | 4.09463  | 1.73058  | H                                | -5.01626 | 4.36228  | 1.72972  | H                                | -3.47692 | 4.30207  | -0.41604 |
| H                                | -0.31954 | 3.87513  | -0.46380 | H                                | -0.05128 | 3.79501  | -0.65889 | H                                | -0.23523 | 3.91801  | -0.24803 |
| H                                | 1.18373  | 4.60464  | -1.03296 | H                                | 1.45250  | 4.40608  | -1.35284 | H                                | 1.27290  | 4.64762  | -0.80350 |
| H                                | 0.09087  | 3.79356  | -2.16719 | H                                | 0.26689  | 3.56909  | -2.36911 | H                                | 0.14977  | 3.91289  | -1.95989 |
| H                                | 6.81545  | -0.70566 | 2.16988  | H                                | 7.02337  | 0.84994  | 1.74895  | H                                | 6.84595  | -0.91221 | 2.06047  |
| H                                | 5.59588  | 0.23366  | 3.03606  | H                                | 6.96685  | -0.88900 | 2.05237  | H                                | 5.66090  | 0.01255  | 2.98809  |
| H                                | 6.79153  | 1.05456  | 2.02724  | H                                | 5.83438  | 0.18793  | 2.87559  | H                                | 6.85743  | 0.85275  | 1.99630  |
| H                                | -3.41590 | -2.73956 | 2.68660  | H                                | -1.84470 | -2.51324 | 3.42958  | H                                | -1.77118 | -2.75145 | 3.19127  |
| H                                | -2.25282 | -3.99943 | 2.22405  | H                                | -3.52620 | -2.28894 | 2.89689  | H                                | -3.44803 | -2.77013 | 2.60175  |
| H                                | -1.74127 | -2.66826 | 3.27866  | H                                | -2.64013 | -3.76216 | 2.45426  | H                                | -2.30664 | -4.02813 | 2.08241  |
| N                                | -1.98783 | -2.12896 | 1.29210  | N                                | -2.05679 | -2.01472 | 1.43059  | N                                | -2.01361 | -2.12362 | 1.23048  |
| O                                | 0.47161  | -2.35688 | -1.36631 | O                                | 0.43925  | -2.53561 | -0.98741 | O                                | 0.42465  | -2.27738 | -1.44897 |

|                            |          |          |          |                            |          |          |          |                            |          |          |          |
|----------------------------|----------|----------|----------|----------------------------|----------|----------|----------|----------------------------|----------|----------|----------|
| O                          | -2.87210 | 0.27548  | -0.26463 | O                          | -2.77919 | 0.41487  | -0.20496 | O                          | -2.85904 | 0.36860  | -0.20966 |
| O                          | -4.19404 | 3.23058  | -0.37004 | O                          | -3.90959 | 3.45683  | -0.37123 | O                          | -4.58024 | 2.63000  | 2.02411  |
| O                          | 0.00013  | -1.34143 | 2.12953  | O                          | -0.10148 | -1.20589 | 2.32405  | O                          | -0.00527 | -1.41430 | 2.08956  |
| O                          | -2.15440 | -1.00219 | -2.07051 | O                          | -2.14733 | -0.97330 | -1.96157 | O                          | -2.17621 | -0.84004 | -2.07525 |
| O                          | -1.65110 | -4.09637 | -0.80252 | O                          | -3.78253 | -3.14652 | -1.68401 | O                          | -1.73110 | -3.99924 | -0.95714 |
| <b>Conformer 4</b>         |          |          |          | <b>Conformer 5</b>         |          |          |          | <b>Conformer 6</b>         |          |          |          |
| Relative energy (kcal/mol) |          |          | 0.76     | Relative energy (kcal/mol) |          |          | 0.92     | Relative energy (kcal/mol) |          |          | 0.98     |
| Population (%)             |          |          | 10.8     | Population (%)             |          |          | 8.2      | Population (%)             |          |          | 7.5      |
| Calcd. [α]D                |          |          | -111.8   | Calcd. [α]D                |          |          | -134.2   | Calcd. [α]D                |          |          | -102.5   |
| C                          | 0.37220  | -1.29118 | -0.80190 | C                          | 0.37633  | -1.34379 | -0.79126 | C                          | 0.38064  | -1.20497 | -0.99324 |
| C                          | 1.33991  | -0.21319 | -1.25885 | C                          | 1.37416  | -0.29718 | -1.27527 | C                          | 1.34843  | -0.08390 | -1.33319 |
| C                          | 0.48420  | 1.08014  | -1.16423 | C                          | 0.56767  | 1.02622  | -1.17922 | C                          | 0.47186  | 1.18668  | -1.15649 |
| C                          | 1.29087  | 2.35354  | -1.05048 | C                          | 1.42012  | 2.27176  | -1.09312 | C                          | 1.25791  | 2.45719  | -0.92672 |
| C                          | 2.59371  | 2.32923  | -0.76237 | C                          | 2.72497  | 2.20493  | -0.82089 | C                          | 2.55137  | 2.42491  | -0.59955 |
| C                          | 3.39466  | 1.08826  | -0.50145 | C                          | 3.48498  | 0.93906  | -0.55660 | C                          | 3.36094  | 1.17619  | -0.41056 |
| C                          | 4.40955  | 1.27879  | 0.63831  | C                          | 4.51791  | 1.10351  | 0.57093  | C                          | 4.33542  | 1.28413  | 0.77417  |
| C                          | 5.28407  | 0.03706  | 0.84947  | C                          | 5.35192  | -0.16581 | 0.78324  | C                          | 5.22144  | 0.03963  | 0.90926  |
| C                          | 4.40689  | -1.20519 | 1.04853  | C                          | 4.43567  | -1.37717 | 0.99750  | C                          | 4.35831  | -1.22673 | 0.97454  |
| C                          | 3.37229  | -1.38640 | -0.06797 | C                          | 3.38357  | -1.52918 | -0.10686 | C                          | 3.36027  | -1.32610 | -0.18499 |
| C                          | 2.50487  | -0.13033 | -0.21097 | C                          | 2.55646  | -0.24587 | -0.24729 | C                          | 2.48015  | -0.07246 | -0.24847 |
| C                          | 1.83215  | -0.49741 | -2.68043 | C                          | 1.83496  | -0.61065 | -2.70054 | C                          | 1.88338  | -0.24270 | -2.75793 |
| C                          | -0.53206 | 0.83492  | -0.00365 | C                          | -0.43333 | 0.83170  | 0.00460  | C                          | -0.55815 | 0.84018  | -0.03459 |
| C                          | -1.93709 | 1.45110  | -0.19166 | C                          | -1.81883 | 1.50014  | -0.16106 | C                          | -1.97626 | 1.42854  | -0.20252 |
| C                          | -2.39233 | 2.34883  | 0.94340  | C                          | -2.21588 | 2.42390  | 0.97570  | C                          | -2.46537 | 2.24758  | 0.97715  |
| C                          | -3.70166 | 3.07816  | 0.69693  | C                          | -3.49994 | 3.20215  | 0.74656  | C                          | -3.77677 | 2.97894  | 0.74901  |
| C                          | -4.44859 | 3.52257  | 1.92469  | C                          | -4.22431 | 3.65848  | 1.98344  | C                          | -4.53642 | 3.36813  | 1.98751  |
| C                          | 0.57016  | 3.64397  | -1.32889 | C                          | 0.74144  | 3.58367  | -1.37676 | C                          | 0.52664  | 3.75534  | -1.13056 |
| C                          | 6.26489  | 0.22773  | 2.00489  | C                          | 6.34818  | -0.00084 | 1.92940  | C                          | 6.16182  | 0.14475  | 2.10848  |
| C                          | -0.90867 | -1.35683 | 1.35898  | C                          | -0.89337 | -1.31702 | 1.39904  | C                          | -0.85011 | -1.39406 | 1.23357  |
| C                          | -0.77744 | -0.67894 | -0.00522 | C                          | -0.73821 | -0.67167 | 0.01993  | C                          | -0.76168 | -0.68032 | -0.12467 |
| C                          | -2.20779 | -0.85370 | -0.61255 | C                          | -2.16347 | -0.79746 | -0.57348 | C                          | -2.19354 | -0.88632 | -0.70641 |
| C                          | -2.86520 | -2.02289 | 0.17413  | C                          | -2.86159 | -1.92538 | 0.22421  | C                          | -2.81703 | -2.06006 | 0.08716  |
| C                          | -3.05784 | -3.32799 | -0.60523 | C                          | -2.96150 | -3.25846 | -0.51073 | C                          | -2.88395 | -3.42301 | -0.61527 |
| C                          | -2.45441 | -2.87013 | 2.52651  | C                          | -2.53205 | -2.70018 | 2.61694  | C                          | -2.40109 | -2.86178 | 2.45358  |
| H                          | -0.10216 | 1.14595  | -2.08749 | H                          | -0.03476 | 1.10415  | -2.09133 | H                          | -0.09767 | 1.31862  | -2.08459 |
| H                          | 3.14109  | 3.26879  | -0.73234 | H                          | 3.30524  | 3.12505  | -0.80785 | H                          | 3.08458  | 3.36553  | -0.48035 |
| H                          | 3.98252  | 0.87260  | -1.40525 | H                          | 4.05567  | 0.69600  | -1.46459 | H                          | 3.98140  | 1.04195  | -1.30839 |
| H                          | 5.04179  | 2.14492  | 0.41809  | H                          | 5.17744  | 1.94578  | 0.33819  | H                          | 4.96162  | 2.17315  | 0.64802  |
| H                          | 3.87139  | 1.50811  | 1.56635  | H                          | 3.99754  | 1.35802  | 1.50259  | H                          | 3.76453  | 1.42814  | 1.69973  |
| H                          | 5.86690  | -0.11287 | -0.06870 | H                          | 5.92180  | -0.34092 | -0.13863 | H                          | 5.83542  | -0.02454 | 0.00146  |
| H                          | 5.03862  | -2.09635 | 1.11369  | H                          | 5.03842  | -2.28838 | 1.06129  | H                          | 5.00206  | -2.11158 | 0.98390  |
| H                          | 2.75455  | -2.25990 | 0.14843  | H                          | 2.73907  | -2.38039 | 0.11962  | H                          | 2.74888  | -2.22222 | -0.06087 |
| H                          | 3.88940  | -1.59116 | -1.01032 | H                          | 3.88325  | -1.75533 | -1.05388 | H                          | 3.90785  | -1.44536 | -1.12482 |
| H                          | 2.03693  | 0.04805  | 0.76395  | H                          | 2.10939  | -0.04594 | 0.73343  | H                          | 1.98106  | 0.01687  | 0.72273  |
| H                          | -0.09518 | 1.14829  | 0.94403  | H                          | 0.03613  | 1.13628  | 0.93948  | H                          | -0.14376 | 1.10774  | 0.93644  |
| H                          | -1.99734 | 1.99335  | -1.13628 | H                          | -1.87324 | 2.04058  | -1.10755 | H                          | -2.03972 | 2.02739  | -1.11281 |
| H                          | -2.45040 | 1.78391  | 1.87669  | H                          | -2.27892 | 1.86784  | 1.91385  | H                          | -2.53838 | 1.62338  | 1.87084  |
| H                          | -1.64325 | 3.13225  | 1.10706  | H                          | -1.43396 | 3.17891  | 1.11930  | H                          | -1.72864 | 3.02559  | 1.20889  |
| H                          | -3.85919 | -1.70114 | 0.49795  | H                          | -3.87331 | -1.60026 | 0.48218  | H                          | -3.84536 | -1.77967 | 0.33217  |
| H                          | 3.88599  | -1.12040 | 2.01016  | H                          | 3.92804  | -1.27035 | 1.96407  | H                          | 3.80738  | -1.23117 | 1.92296  |
| H                          | -3.24122 | -4.14388 | 0.09872  | H                          | -1.98316 | -3.56440 | -0.88787 | H                          | -3.52438 | -4.07696 | -0.01999 |
| H                          | -3.94508 | -3.22852 | -1.23054 | H                          | -3.33477 | -4.02740 | 0.16956  | H                          | -3.37468 | -3.27884 | -1.58290 |
| H                          | -2.06139 | -1.92684 | -2.21866 | H                          | -2.89700 | -1.55459 | -2.20296 | H                          | -2.05193 | -0.35024 | -2.57399 |
| H                          | -1.13036 | -3.56895 | -1.05014 | H                          | -3.90497 | -3.85524 | -2.13640 | H                          | -0.96622 | -3.49256 | -1.09899 |
| H                          | 2.48950  | 0.29834  | -3.03154 | H                          | 2.52593  | 0.14946  | -3.06644 | H                          | 1.05786  | -0.25777 | -3.47267 |
| H                          | 2.37688  | -1.43945 | -2.73456 | H                          | 2.33296  | -1.57841 | -2.75438 | H                          | 2.53873  | 0.58706  | -3.02328 |
| H                          | 0.98631  | -0.55870 | -3.36824 | H                          | 0.97918  | -0.63689 | -3.37828 | H                          | 2.44252  | -1.17045 | -2.87434 |
| H                          | -5.26075 | 4.19792  | 1.66061  | H                          | -4.65897 | 2.78515  | 2.47991  | H                          | -4.94783 | 2.46442  | 2.44804  |
| H                          | -3.77078 | 4.00438  | 2.63367  | H                          | -5.01556 | 4.36275  | 1.73165  | H                          | -5.34836 | 4.05164  | 1.74459  |
| H                          | -4.85801 | 2.64051  | 2.42711  | H                          | -3.52646 | 4.11056  | 2.69261  | H                          | -3.86710 | 3.82137  | 2.72286  |
| H                          | 1.25430  | 4.49273  | -1.28434 | H                          | -0.05038 | 3.79776  | -0.65367 | H                          | -0.30926 | 3.86652  | -0.43436 |
| H                          | 0.10630  | 3.62799  | -2.32038 | H                          | 1.45406  | 4.40937  | -1.34570 | H                          | 1.19356  | 4.60743  | -0.99082 |
| H                          | -0.23420 | 3.82497  | -0.61064 | H                          | 0.26852  | 3.57488  | -2.36412 | H                          | 0.10342  | 3.81222  | -2.13874 |
| H                          | 6.90944  | 1.09541  | 1.83986  | H                          | 6.96338  | -0.89650 | 2.05152  | H                          | 5.59793  | 0.21228  | 3.04390  |
| H                          | 6.90919  | -0.64735 | 2.12593  | H                          | 5.82995  | 0.17807  | 2.87650  | H                          | 6.79763  | 1.03154  | 2.03853  |
| H                          | 5.73344  | 0.38241  | 2.94891  | H                          | 7.02048  | 0.84333  | 1.75341  | H                          | 6.81545  | -0.72909 | 2.17706  |
| H                          | -2.63623 | -3.91945 | 2.29265  | H                          | -1.86004 | -2.47507 | 3.44155  | H                          | -3.45459 | -2.68338 | 2.67488  |
| H                          | -1.68255 | -2.80573 | 3.28903  | H                          | -3.53759 | -2.35316 | 2.86464  | H                          | -2.25313 | -3.93026 | 2.28032  |
| H                          | -3.37913 | -2.43094 | 2.91074  | H                          | -2.56011 | -3.78114 | 2.46836  | H                          | -1.79723 | -2.55641 | 3.30487  |
| N                          | -2.00520 | -2.14977 | 1.34966  | N                          | -2.05207 | -2.01650 | 1.43070  | N                          | -2.00850 | -2.08193 | 1.29734  |
| O                          | 0.48061  | -2.47961 | -1.02570 | O                          | 0.43789  | -2.53252 | -0.99784 | O                          | 0.46947  | -2.35182 | -1.37882 |
| O                          | -2.85618 | 0.33009  | -0.25689 | O                          | -2.77924 | 0.41673  | -0.20180 | O                          | -2.87086 | 0.29328  | -0.35009 |
| O                          | -4.10678 | 3.31339  | -0.42420 | O                          | -3.90286 | 3.46488  | -0.36937 | O                          | -4.17385 | 3.25838  | -0.36490 |



|                                  |          |          |          |   |          |          |          |   |          |          |          |
|----------------------------------|----------|----------|----------|---|----------|----------|----------|---|----------|----------|----------|
| O                                | -2.06549 | -3.53692 | -1.62906 | O | -3.91627 | -2.90553 | -1.70047 | O | -1.75552 | -3.98990 | -0.87465 |
| <b>Conformer 10</b>              |          |          |          |   |          |          |          |   |          |          |          |
| Relative energy (kcal/mol)       |          |          |          |   |          |          |          |   |          |          | 2.05     |
| Population (%)                   |          |          |          |   |          |          |          |   |          |          | 1.2      |
| Calcd. [ $\alpha$ ] <sub>D</sub> |          |          |          |   |          |          |          |   |          |          | -140.5   |
| C                                | 0.38068  | -1.34104 | -0.80083 |   |          |          |          |   |          |          |          |
| C                                | 1.37588  | -0.28871 | -1.27685 |   |          |          |          |   |          |          |          |
| C                                | 0.56395  | 1.03100  | -1.18390 |   |          |          |          |   |          |          |          |
| C                                | 1.41015  | 2.28011  | -1.08607 |   |          |          |          |   |          |          |          |
| C                                | 2.71397  | 2.21764  | -0.80838 |   |          |          |          |   |          |          |          |
| C                                | 3.47835  | 0.95400  | -0.54624 |   |          |          |          |   |          |          |          |
| C                                | 4.50676  | 1.11947  | 0.58529  |   |          |          |          |   |          |          |          |
| C                                | 5.34438  | -0.14739 | 0.79778  |   |          |          |          |   |          |          |          |
| C                                | 4.43148  | -1.36214 | 1.00680  |   |          |          |          |   |          |          |          |
| C                                | 3.38408  | -1.51592 | -0.10176 |   |          |          |          |   |          |          |          |
| C                                | 2.55327  | -0.23511 | -0.24299 |   |          |          |          |   |          |          |          |
| C                                | 1.84450  | -0.59799 | -2.70059 |   |          |          |          |   |          |          |          |
| C                                | -0.44310 | 0.82974  | -0.00706 |   |          |          |          |   |          |          |          |
| C                                | -1.82520 | 1.49747  | -0.17543 |   |          |          |          |   |          |          |          |
| C                                | -2.24553 | 2.39134  | 0.97507  |   |          |          |          |   |          |          |          |
| C                                | -3.53455 | 3.16170  | 0.74606  |   |          |          |          |   |          |          |          |
| C                                | -4.25403 | 3.62373  | 1.98322  |   |          |          |          |   |          |          |          |
| C                                | 0.72546  | 3.59054  | -1.36192 |   |          |          |          |   |          |          |          |
| C                                | 6.33629  | 0.01878  | 1.94752  |   |          |          |          |   |          |          |          |
| C                                | -0.89815 | -1.30730 | 1.39884  |   |          |          |          |   |          |          |          |
| C                                | -0.74083 | -0.67707 | 0.01141  |   |          |          |          |   |          |          |          |
| C                                | -2.16569 | -0.80464 | -0.57634 |   |          |          |          |   |          |          |          |
| C                                | -2.85428 | -1.94084 | 0.21323  |   |          |          |          |   |          |          |          |
| C                                | -2.86829 | -3.30386 | -0.48972 |   |          |          |          |   |          |          |          |
| C                                | -2.55569 | -2.64682 | 2.63695  |   |          |          |          |   |          |          |          |
| H                                | -0.03171 | 1.10983  | -2.10036 |   |          |          |          |   |          |          |          |
| H                                | 3.28966  | 3.14044  | -0.78708 |   |          |          |          |   |          |          |          |
| H                                | 4.05280  | 0.71586  | -1.45309 |   |          |          |          |   |          |          |          |
| H                                | 5.16404  | 1.96456  | 0.35652  |   |          |          |          |   |          |          |          |
| H                                | 3.98226  | 1.37014  | 1.51566  |   |          |          |          |   |          |          |          |
| H                                | 5.91783  | -0.31882 | -0.12256 |   |          |          |          |   |          |          |          |
| H                                | 5.03693  | -2.27148 | 1.07118  |   |          |          |          |   |          |          |          |
| H                                | 2.74178  | -2.36973 | 0.12119  |   |          |          |          |   |          |          |          |
| H                                | 3.88808  | -1.73887 | -1.04720 |   |          |          |          |   |          |          |          |
| H                                | 2.10132  | -0.03872 | 0.73616  |   |          |          |          |   |          |          |          |
| H                                | 0.02138  | 1.13365  | 0.93036  |   |          |          |          |   |          |          |          |
| H                                | -1.87607 | 2.05541  | -1.11088 |   |          |          |          |   |          |          |          |
| H                                | -2.31332 | 1.81709  | 1.90191  |   |          |          |          |   |          |          |          |
| H                                | -1.47133 | 3.14952  | 1.14151  |   |          |          |          |   |          |          |          |
| H                                | -3.88482 | -1.65146 | 0.43541  |   |          |          |          |   |          |          |          |
| H                                | 3.91994  | -1.25864 | 1.97165  |   |          |          |          |   |          |          |          |
| H                                | -1.85744 | -3.56672 | -0.81367 |   |          |          |          |   |          |          |          |
| H                                | -3.20186 | -4.05923 | 0.22237  |   |          |          |          |   |          |          |          |
| H                                | -2.83653 | -0.41480 | -2.35133 |   |          |          |          |   |          |          |          |
| H                                | -3.43412 | -2.75082 | -2.25281 |   |          |          |          |   |          |          |          |
| H                                | 2.53187  | 0.16729  | -3.06233 |   |          |          |          |   |          |          |          |
| H                                | 2.34904  | -1.56231 | -2.75352 |   |          |          |          |   |          |          |          |
| H                                | 0.99164  | -0.62894 | -3.38177 |   |          |          |          |   |          |          |          |
| H                                | -3.55417 | 4.07882  | 2.68832  |   |          |          |          |   |          |          |          |
| H                                | -4.68745 | 2.75249  | 2.48446  |   |          |          |          |   |          |          |          |
| H                                | -5.04624 | 4.32658  | 1.73061  |   |          |          |          |   |          |          |          |
| H                                | -0.06756 | 3.79600  | -0.63738 |   |          |          |          |   |          |          |          |
| H                                | 1.43418  | 4.41925  | -1.32457 |   |          |          |          |   |          |          |          |
| H                                | 0.25325  | 3.58646  | -2.34965 |   |          |          |          |   |          |          |          |
| H                                | 6.95410  | -0.87504 | 2.06993  |   |          |          |          |   |          |          |          |
| H                                | 5.81437  | 0.19412  | 2.89326  |   |          |          |          |   |          |          |          |
| H                                | 7.00630  | 0.86555  | 1.77531  |   |          |          |          |   |          |          |          |
| H                                | -2.51597 | -3.73270 | 2.53036  |   |          |          |          |   |          |          |          |
| H                                | -1.93213 | -2.35354 | 3.47822  |   |          |          |          |   |          |          |          |
| H                                | -3.58823 | -2.35069 | 2.83130  |   |          |          |          |   |          |          |          |
| N                                | -2.07184 | -1.97695 | 1.44454  |   |          |          |          |   |          |          |          |
| O                                | 0.44701  | -2.52764 | -1.01545 |   |          |          |          |   |          |          |          |
| O                                | -2.78733 | 0.40455  | -0.25755 |   |          |          |          |   |          |          |          |
| O                                | -3.94482 | 3.41158  | -0.37007 |   |          |          |          |   |          |          |          |
| O                                | -0.08968 | -1.20399 | 2.31113  |   |          |          |          |   |          |          |          |
| O                                | -2.16626 | -1.01045 | -1.98308 |   |          |          |          |   |          |          |          |
| O                                | -3.78795 | -3.34180 | -1.57421 |   |          |          |          |   |          |          |          |

**Table S2.** Cartesian coordinates, energies, and population at 298 K of significantly populated conformers of compound 5'-*epi*-1. Conformers were optimized at the B3LYP/TZVP/SMD(ACN) level.

| Conformer 1                |          |          |          | Conformer 2                |          |          |          | Conformer 3                |          |          |          |
|----------------------------|----------|----------|----------|----------------------------|----------|----------|----------|----------------------------|----------|----------|----------|
| Relative energy (kcal/mol) |          |          | 0.00     | Relative energy (kcal/mol) |          |          | 0.05     | Relative energy (kcal/mol) |          |          | 0.32     |
| Population (%)             |          |          | 22.7     | Population (%)             |          |          | 22.0     | Population (%)             |          |          | 13.1     |
| C                          | -0.57638 | -1.28034 | 1.10568  | C                          | -0.57215 | -1.20718 | 1.13624  | C                          | -0.56244 | -1.10536 | 1.25696  |
| C                          | -1.54097 | -0.12372 | 1.34556  | C                          | -1.54821 | -0.05054 | 1.32877  | C                          | -1.54621 | 0.04987  | 1.36668  |
| C                          | -0.65721 | 1.12854  | 1.09419  | C                          | -0.68628 | 1.20025  | 1.00447  | C                          | -0.67292 | 1.27833  | 0.98842  |
| C                          | -1.43090 | 2.38102  | 0.75084  | C                          | -1.47824 | 2.41699  | 0.58184  | C                          | -1.45753 | 2.47382  | 0.49787  |
| C                          | -2.71846 | 2.33053  | 0.40342  | C                          | -2.77033 | 2.33067  | 0.25950  | C                          | -2.74208 | 2.37014  | 0.15099  |
| C                          | -3.53159 | 1.07468  | 0.29540  | C                          | -3.57068 | 1.06246  | 0.24594  | C                          | -3.54213 | 1.10135  | 0.18235  |
| C                          | -4.48502 | 1.09868  | -0.91118 | C                          | -4.54886 | 1.00609  | -0.93969 | C                          | -4.49178 | 0.97930  | -1.02112 |
| C                          | -5.37641 | -0.14774 | -0.97001 | C                          | -5.42314 | -0.25318 | -0.91122 | C                          | -5.36565 | -0.27863 | -0.94331 |
| C                          | -4.52026 | -1.41948 | -0.92411 | C                          | -4.54650 | -1.50787 | -0.81545 | C                          | -4.49142 | -1.52569 | -0.76053 |
| C                          | -3.54429 | -1.43624 | 0.25808  | C                          | -3.54892 | -1.44702 | 0.34661  | C                          | -3.51938 | -1.40074 | 0.41803  |
| C                          | -2.65547 | -0.18708 | 0.24454  | C                          | -2.67800 | -0.18857 | 0.25006  | C                          | -2.64992 | -0.14627 | 0.27242  |
| C                          | -2.10257 | -0.17825 | 2.76813  | C                          | -2.08945 | -0.03924 | 2.76078  | C                          | -2.11443 | 0.14215  | 2.78429  |
| C                          | 0.40101  | 0.69782  | 0.02779  | C                          | 0.38326  | 0.72861  | -0.03196 | C                          | 0.40022  | 0.75082  | -0.01803 |
| C                          | 1.80684  | 1.32449  | 0.17331  | C                          | 1.77842  | 1.38115  | 0.08765  | C                          | 1.81042  | 1.36680  | 0.10596  |
| C                          | 2.32058  | 2.02183  | -1.07118 | C                          | 2.32417  | 1.92616  | -1.23604 | C                          | 2.37901  | 1.87956  | -1.22155 |
| C                          | 3.61355  | 2.79724  | -0.88957 | C                          | 3.74167  | 2.44193  | -1.08556 | C                          | 3.80671  | 2.36395  | -1.06809 |
| C                          | 4.34710  | 3.15388  | -2.15353 | C                          | 3.91632  | 3.90208  | -0.78576 | C                          | 4.01502  | 3.82353  | -0.79104 |
| C                          | -0.69680 | 3.68859  | 0.86906  | C                          | -0.75465 | 3.73590  | 0.58167  | C                          | -0.73227 | 3.79074  | 0.45725  |
| C                          | -6.29369 | -0.12770 | -2.19143 | C                          | -6.36653 | -0.31248 | -2.11122 | C                          | -6.28265 | -0.40449 | -2.15850 |
| C                          | 0.82057  | -1.68712 | -0.95854 | C                          | 0.84782  | -1.69549 | -0.89116 | C                          | 0.73218  | -1.70156 | -0.83447 |
| C                          | 0.62115  | -0.79887 | 0.27383  | C                          | 0.62722  | -0.74986 | 0.29200  | C                          | 0.60183  | -0.72627 | 0.33842  |
| C                          | 1.98632  | -0.89175 | 0.98008  | C                          | 1.98288  | -0.78571 | 1.02502  | C                          | 1.98914  | -0.80979 | 1.03237  |
| C                          | 2.62397  | -2.20902 | 0.48507  | C                          | 2.69150  | -2.07511 | 0.55019  | C                          | 2.64526  | -2.10940 | 0.50691  |
| C                          | 4.14963  | -2.20656 | 0.36214  | C                          | 4.21317  | -1.97486 | 0.35926  | C                          | 4.15529  | -2.02481 | 0.23061  |
| C                          | 2.31487  | -3.50492 | -1.68359 | C                          | 2.38812  | -3.50528 | -1.52865 | C                          | 2.19936  | -3.54601 | -1.53757 |
| H                          | -0.10773 | 1.32678  | 2.02098  | H                          | -0.14501 | 1.46451  | 1.91985  | H                          | -0.13797 | 1.58497  | 1.89441  |
| H                          | -3.24399 | 3.26172  | 0.20303  | H                          | -3.30701 | 3.24074  | 0.00037  | H                          | -3.27375 | 3.26621  | -0.16168 |
| H                          | -4.16859 | 1.01145  | 1.18948  | H                          | -4.18798 | 1.04382  | 1.15565  | H                          | -4.18103 | 1.12938  | 1.07685  |
| H                          | -5.10766 | 1.99786  | -0.86328 | H                          | -5.18281 | 1.89854  | -0.92843 | H                          | -5.12684 | 1.86952  | -1.07300 |
| H                          | -3.89698 | 1.17052  | -1.83452 | H                          | -3.98073 | 1.03410  | -1.87774 | H                          | -3.90219 | 0.95725  | -1.94594 |
| H                          | -6.00785 | -0.14118 | -0.07193 | H                          | -6.03520 | -0.20675 | -0.00099 | H                          | -5.99732 | -0.18362 | -0.05044 |
| H                          | -5.16934 | -2.29942 | -0.87954 | H                          | -5.18050 | -2.39372 | -0.71114 | H                          | -5.12795 | -2.40502 | -0.62222 |
| H                          | -2.93732 | -2.34236 | 0.21580  | H                          | -2.92987 | -2.34565 | 0.34231  | H                          | -2.89759 | -2.29674 | 0.47300  |
| H                          | -4.11048 | -1.47956 | 1.19357  | H                          | -4.09771 | -1.44703 | 1.29339  | H                          | -4.08784 | -1.35380 | 1.35188  |
| H                          | -2.14064 | -0.17196 | -0.72320 | H                          | -2.17767 | -0.21928 | -0.72518 | H                          | -2.12708 | -0.23006 | -0.68714 |
| H                          | 0.00574  | 0.86388  | -0.97375 | H                          | -0.00782 | 0.83976  | -1.04259 | H                          | 0.02849  | 0.85171  | -1.03674 |
| H                          | 1.83953  | 2.00974  | 1.02054  | H                          | 1.77314  | 2.17333  | 0.83871  | H                          | 1.81934  | 2.16994  | 0.84555  |
| H                          | 2.42883  | 1.31126  | -1.89486 | H                          | 2.31812  | 1.12830  | -1.98051 | H                          | 2.35910  | 1.07113  | -1.95439 |
| H                          | 1.57662  | 2.75436  | -1.40476 | H                          | 1.66522  | 2.72931  | -1.56897 | H                          | 1.74167  | 2.69296  | -1.57121 |
| H                          | 2.36840  | -2.99185 | 1.20732  | H                          | 2.52053  | -2.84922 | 1.30617  | H                          | 2.51543  | -2.89078 | 1.26536  |
| H                          | -3.95222 | -1.49768 | -1.85927 | H                          | -3.99535 | -1.62741 | -1.75632 | H                          | -3.91983 | -1.69539 | -1.68116 |
| H                          | 4.56408  | -1.94504 | 1.34478  | H                          | 4.64127  | -1.55518 | 1.27834  | H                          | 4.63310  | -1.60114 | 1.12102  |
| H                          | 4.48990  | -3.21747 | 0.13481  | H                          | 4.60967  | -2.98699 | 0.26254  | H                          | 4.53552  | -3.04182 | 0.11878  |
| H                          | 2.74024  | -0.81258 | 2.76862  | H                          | 2.69281  | -0.69453 | 2.83144  | H                          | 1.57539  | -1.55653 | 2.79331  |
| H                          | 4.26461  | -0.49320 | -0.51859 | H                          | 4.42150  | -0.33169 | -0.71330 | H                          | 4.40899  | -0.37626 | -0.83184 |
| H                          | -2.65535 | -1.10090 | 2.94286  | H                          | -2.76444 | 0.80259  | 2.91812  | H                          | -2.66944 | -0.75642 | 3.05186  |
| H                          | -1.29162 | -0.13086 | 3.49775  | H                          | -2.62944 | -0.95748 | 2.98985  | H                          | -1.30614 | 0.26398  | 3.50841  |
| H                          | -2.77118 | 0.66176  | 2.95853  | H                          | -1.26912 | 0.05362  | 3.47531  | H                          | -2.78204 | 0.99842  | 2.88377  |
| H                          | 4.78094  | 2.24377  | -2.57955 | H                          | 3.27465  | 4.19750  | 0.04852  | H                          | 5.05779  | 4.03194  | -0.55877 |
| H                          | 5.14120  | 3.87031  | -1.94972 | H                          | 3.59035  | 4.48367  | -1.65378 | H                          | 3.37166  | 4.14893  | 0.03068  |
| H                          | 3.65748  | 3.55553  | -2.89979 | H                          | 4.95618  | 4.13229  | -0.56101 | H                          | 3.71276  | 4.39759  | -1.67260 |
| H                          | -1.35569 | 4.53006  | 0.64932  | H                          | -0.30835 | 3.94063  | 1.56007  | H                          | -0.32534 | 4.04550  | 1.44118  |
| H                          | -0.29465 | 3.82174  | 1.87867  | H                          | 0.06243  | 3.75134  | -0.14555 | H                          | 0.11433  | 3.76635  | -0.23496 |
| H                          | 0.15465  | 3.74275  | 0.18500  | H                          | -1.43280 | 4.55477  | 0.33670  | H                          | -1.39755 | 4.59631  | 0.14278  |
| H                          | -6.92536 | 0.76479  | -2.19973 | H                          | -7.01223 | 0.56894  | -2.15330 | H                          | -6.92764 | 0.47233  | -2.26215 |
| H                          | -6.95125 | -1.00117 | -2.20749 | H                          | -7.01044 | -1.19502 | -2.06570 | H                          | -6.92701 | -1.28429 | -2.07907 |
| H                          | -5.71205 | -0.13248 | -3.11840 | H                          | -5.80492 | -0.35885 | -3.04929 | H                          | -5.70089 | -0.50067 | -3.08037 |
| H                          | 2.36816  | -4.45790 | -1.15177 | H                          | 2.49971  | -4.41944 | -0.94076 | H                          | 1.39154  | -3.69623 | -2.24958 |
| H                          | 1.56806  | -3.57769 | -2.47051 | H                          | 1.62521  | -3.66082 | -2.28763 | H                          | 3.12251  | -3.34020 | -2.08092 |
| H                          | 3.28707  | -3.29505 | -2.13204 | H                          | 3.33746  | -3.27894 | -2.01582 | H                          | 2.33071  | -4.45582 | -0.94705 |
| N                          | 1.92300  | -2.44601 | -0.77523 | N                          | 1.97067  | -2.41203 | -0.67403 | N                          | 1.85078  | -2.43778 | -0.67088 |
| O                          | -0.71023 | -2.41586 | 1.49357  | O                          | -0.70175 | -2.32840 | 1.56397  | O                          | -0.63132 | -2.16538 | 1.83686  |
| O                          | 2.70371  | 0.21430  | 0.46908  | O                          | 2.67565  | 0.34132  | 0.54471  | O                          | 2.68100  | 0.31613  | 0.58776  |
| O                          | 4.01892  | 3.12915  | 0.20672  | O                          | 4.69406  | 1.68978  | -1.19643 | O                          | 4.74199  | 1.58729  | -1.15949 |
| O                          | 0.07534  | -1.71141 | -1.92869 | O                          | 0.09731  | -1.79464 | -1.85329 | O                          | -0.07095 | -1.79799 | -1.75362 |



| Conformer 7                |          |          |          | Conformer 8                |          |          |          | Conformer 9                |          |          |          |
|----------------------------|----------|----------|----------|----------------------------|----------|----------|----------|----------------------------|----------|----------|----------|
| Relative energy (kcal/mol) |          |          | 1.04     | Relative energy (kcal/mol) |          |          | 1.06     | Relative energy (kcal/mol) |          |          | 1.12     |
| Population (%)             |          |          | 3.9      | Population (%)             |          |          | 3.8      | Population (%)             |          |          | 3.4      |
| C                          | 0.53511  | -1.31115 | -1.01725 | C                          | 0.50115  | -1.32546 | -0.97172 | C                          | 0.50291  | -1.32818 | -0.96691 |
| C                          | 1.49303  | -0.16839 | -1.33745 | C                          | 1.47704  | -0.20983 | -1.33187 | C                          | 1.47711  | -0.21184 | -1.32970 |
| C                          | 0.62477  | 1.09597  | -1.09413 | C                          | 0.63532  | 1.07771  | -1.11286 | C                          | 0.63399  | 1.07509  | -1.11237 |
| C                          | 1.41654  | 2.35561  | -0.82661 | C                          | 1.45492  | 2.32759  | -0.88688 | C                          | 1.45204  | 2.32631  | -0.88826 |
| C                          | 2.71679  | 2.31048  | -0.52912 | C                          | 2.75669  | 2.26444  | -0.59923 | C                          | 2.75412  | 2.26527  | -0.60161 |
| C                          | 3.52880  | 1.05488  | -0.40969 | C                          | 3.54465  | 0.99645  | -0.45224 | C                          | 3.54390  | 0.99853  | -0.45369 |
| C                          | 4.52975  | 1.11539  | 0.75624  | C                          | 4.55525  | 1.06720  | 0.70481  | C                          | 4.55565  | 1.07236  | 0.70217  |
| C                          | 5.41765  | -0.13312 | 0.82266  | C                          | 5.41869  | -0.19674 | 0.79791  | C                          | 5.42077  | -0.19034 | 0.79640  |
| C                          | 4.55485  | -1.40073 | 0.85591  | C                          | 4.53126  | -1.44563 | 0.86981  | C                          | 4.53492  | -1.44017 | 0.87127  |
| C                          | 3.53213  | -1.45333 | -0.28497 | C                          | 3.49934  | -1.50721 | -0.26223 | C                          | 3.50199  | -1.50488 | -0.25965 |
| C                          | 2.64985  | -0.19947 | -0.28041 | C                          | 2.64203  | -0.23627 | -0.28387 | C                          | 2.64301  | -0.23509 | -0.28260 |
| C                          | 1.99677  | -0.27515 | -2.77848 | C                          | 1.96585  | -0.36326 | -2.77366 | C                          | 1.96508  | -0.36725 | -2.77158 |
| C                          | -0.39066 | 0.70897  | 0.02923  | C                          | -0.37412 | 0.73813  | 0.03052  | C                          | -0.37499 | 0.73600  | 0.03155  |
| C                          | -1.80188 | 1.33204  | -0.08739 | C                          | -1.77984 | 1.37562  | -0.08245 | C                          | -1.78129 | 1.37220  | -0.08180 |
| C                          | -2.26669 | 2.08208  | 1.14593  | C                          | -2.21193 | 2.18348  | 1.12619  | C                          | -2.21396 | 2.17888  | 1.12743  |
| C                          | -3.57127 | 2.84115  | 0.98337  | C                          | -3.50580 | 2.95876  | 0.95048  | C                          | -3.50840 | 2.95325  | 0.95335  |
| C                          | -4.27346 | 3.22006  | 2.25881  | C                          | -4.21568 | 3.34863  | 2.21829  | C                          | -4.21361 | 3.34798  | 2.22237  |
| C                          | 0.68357  | 3.66234  | -0.95971 | C                          | 0.74708  | 3.64486  | -1.04903 | C                          | 0.74221  | 3.64248  | -1.05084 |
| C                          | 6.38381  | -0.07565 | 2.00454  | C                          | 6.39418  | -0.12814 | 1.97150  | C                          | 6.39747  | -0.11860 | 1.96879  |
| C                          | -0.76309 | -1.63954 | 1.11920  | C                          | -0.79658 | -1.55893 | 1.19033  | C                          | -0.80076 | -1.55984 | 1.19258  |
| C                          | -0.62343 | -0.79520 | -0.15157 | C                          | -0.63633 | -0.76479 | -0.11206 | C                          | -0.63643 | -0.76696 | -0.11034 |
| C                          | -2.02128 | -0.91066 | -0.78946 | C                          | -2.04526 | -0.86560 | -0.73296 | C                          | -2.04381 | -0.86858 | -0.73499 |
| C                          | -2.65187 | -2.19045 | -0.19941 | C                          | -2.65998 | -2.14710 | -0.13428 | C                          | -2.65541 | -2.15187 | -0.13781 |
| C                          | -4.15728 | -2.06953 | 0.05701  | C                          | -4.17843 | -2.09149 | 0.00332  | C                          | -4.16941 | -2.10749 | -0.00958 |
| C                          | -2.20971 | -3.44307 | 1.97217  | C                          | -2.29859 | -3.27473 | 2.12328  | C                          | -2.30598 | -3.27414 | 2.12401  |
| H                          | 0.03844  | 1.26453  | -2.00435 | H                          | 0.04208  | 1.23396  | -2.02071 | H                          | 0.04046  | 1.22937  | -2.02038 |
| H                          | 3.25331  | 3.24541  | -0.38234 | H                          | 3.31307  | 3.19198  | -0.48256 | H                          | 3.30930  | 3.19372  | -0.48638 |
| H                          | 4.12906  | 0.95700  | -1.32578 | H                          | 4.13596  | 0.86235  | -1.36959 | H                          | 4.13439  | 0.86383  | -1.37147 |
| H                          | 5.15370  | 2.00889  | 0.65212  | H                          | 5.19613  | 1.94494  | 0.57307  | H                          | 5.19528  | 1.95070  | 0.56833  |
| H                          | 3.97961  | 1.22243  | 1.69930  | H                          | 4.01432  | 1.20979  | 1.64851  | H                          | 4.01556  | 1.21579  | 1.64621  |
| H                          | 6.01202  | -0.16136 | -0.09994 | H                          | 6.00578  | -0.26072 | -0.12755 | H                          | 6.00692  | -0.25513 | -0.12959 |
| H                          | 5.19777  | -2.28544 | 0.81647  | H                          | 5.15627  | -2.34372 | 0.84904  | H                          | 5.16099  | -2.33754 | 0.85138  |
| H                          | 2.92326  | -2.35374 | -0.18637 | H                          | 2.87346  | -2.39236 | -0.13590 | H                          | 2.87738  | -2.39062 | -0.13136 |
| H                          | 4.06007  | -1.53300 | -1.24024 | H                          | 4.01828  | -1.62204 | -1.21887 | H                          | 4.02017  | -1.62055 | -1.21660 |
| H                          | 2.17350  | -0.14775 | 0.70554  | H                          | 2.17490  | -0.14942 | 0.70406  | H                          | 2.17659  | -0.14718 | 0.70561  |
| H                          | 0.04364  | 0.91348  | 1.00722  | H                          | 0.07527  | 0.95798  | 0.99836  | H                          | 0.07452  | 0.95686  | 0.99911  |
| H                          | -1.86373 | 1.98404  | -0.95952 | H                          | -1.85002 | 1.99205  | -0.97995 | H                          | -1.85116 | 1.98964  | -0.97869 |
| H                          | -2.33801 | 1.40608  | 2.00177  | H                          | -2.28036 | 1.54375  | 2.00932  | H                          | -2.28169 | 1.53855  | 2.01024  |
| H                          | -1.51579 | 2.83332  | 1.41682  | H                          | -1.44579 | 2.93361  | 1.35412  | H                          | -1.44828 | 2.92931  | 1.35596  |
| H                          | -2.47706 | -3.01254 | -0.90027 | H                          | -2.40769 | -2.98310 | -0.79635 | H                          | -2.39794 | -2.98567 | -0.79969 |
| H                          | 4.02445  | -1.44285 | 1.81519  | H                          | 4.00710  | -1.45234 | 1.83343  | H                          | 4.01172  | -1.44592 | 1.83542  |
| H                          | -4.57520 | -3.05281 | 0.27303  | H                          | -4.55621 | -3.00917 | 0.45847  | H                          | -4.54035 | -3.03345 | 0.43877  |
| H                          | -4.34452 | -1.41989 | 0.91399  | H                          | -4.47692 | -1.24741 | 0.62266  | H                          | -4.47969 | -1.26443 | 0.61035  |
| H                          | -2.84565 | -1.11596 | -2.53074 | H                          | -2.94171 | -1.00234 | -2.42454 | H                          | -2.93550 | -1.04364 | -2.42361 |
| H                          | -4.76282 | -0.61865 | -1.09288 | H                          | -4.85694 | -2.75293 | -1.71821 | H                          | -5.59678 | -1.73742 | -1.31219 |
| H                          | 1.15721  | -0.25074 | -3.47622 | H                          | 1.12074  | -0.34107 | -3.46477 | H                          | 2.49011  | -1.31139 | -2.91458 |
| H                          | 2.65918  | 0.55508  | -3.02537 | H                          | 2.64153  | 0.44752  | -3.04785 | H                          | 1.11951  | -0.34690 | -3.46217 |
| H                          | 2.54014  | -1.20537 | -2.94239 | H                          | 2.49030  | -1.30754 | -2.91791 | H                          | 2.63998  | 0.44355  | -3.04761 |
| H                          | -3.56678 | 3.64030  | 2.97840  | H                          | -5.01207 | 4.06192  | 2.01218  | H                          | -5.00966 | 4.06176  | 2.01665  |
| H                          | -4.69051 | 2.31640  | 2.71433  | H                          | -3.51091 | 3.76676  | 2.94117  | H                          | -3.50609 | 3.76719  | 2.94189  |
| H                          | -5.07694 | 3.92793  | 2.06182  | H                          | -4.64239 | 2.45007  | 2.67493  | H                          | -4.64026 | 2.45141  | 2.68299  |
| H                          | -0.13676 | 3.74577  | -0.24140 | H                          | -0.06256 | 3.76541  | -0.32394 | H                          | 1.43166  | 4.47868  | -0.92432 |
| H                          | 1.35519  | 4.50715  | -0.79920 | H                          | 1.43739  | 4.48004  | -0.92049 | H                          | 0.28519  | 3.72120  | -2.04261 |
| H                          | 0.23825  | 3.76201  | -1.95493 | H                          | 0.29174  | 3.72526  | -2.04146 | H                          | -0.06641 | 3.76278  | -0.32454 |
| H                          | 7.01912  | 0.81295  | 1.95603  | H                          | 7.03002  | -1.01685 | 2.01058  | H                          | 7.03443  | -1.00646 | 2.00864  |
| H                          | 7.03771  | -0.95178 | 2.02474  | H                          | 5.85807  | -0.06094 | 2.92316  | H                          | 5.86235  | -0.05044 | 2.92094  |
| H                          | 5.84013  | -0.04472 | 2.95377  | H                          | 7.04734  | 0.74543  | 1.89527  | H                          | 7.04949  | 0.75563  | 1.89036  |
| H                          | -2.33479 | -4.39657 | 1.45397  | H                          | -3.24110 | -3.02015 | 2.61099  | H                          | -2.39265 | -4.26160 | 1.66423  |
| H                          | -1.39579 | -3.52894 | 2.68813  | H                          | -2.39662 | -4.25922 | 1.65934  | H                          | -1.52697 | -3.30044 | 2.88218  |
| H                          | -3.13069 | -3.21181 | 2.51069  | H                          | -1.51217 | -3.31050 | 2.87340  | H                          | -3.25510 | -3.02314 | 2.60064  |
| N                          | -1.87636 | -2.40096 | 1.01944  | N                          | -1.93725 | -2.28472 | 1.12679  | N                          | -1.94127 | -2.28615 | 1.12686  |
| O                          | 0.64922  | -2.46007 | -1.37024 | O                          | 0.58918  | -2.48536 | -1.29783 | O                          | 0.59359  | -2.48895 | -1.28912 |
| O                          | -2.70914 | 0.21724  | -0.29672 | O                          | -2.70514 | 0.26676  | -0.22292 | O                          | -2.70544 | 0.26301  | -0.22423 |
| O                          | -4.01004 | 3.14639  | -0.10796 | O                          | -3.92830 | 3.27023  | -0.14542 | O                          | -3.93543 | 3.26026  | -0.14208 |
| O                          | 0.02936  | -1.63765 | 2.05092  | O                          | -0.00303 | -1.54138 | 2.12079  | O                          | -0.01030 | -1.54110 | 2.12550  |
| O                          | -1.96120 | -0.91311 | -2.19031 | O                          | -2.02527 | -0.86734 | -2.13475 | O                          | -2.02426 | -0.87219 | -2.13592 |
| O                          | -4.82857 | -1.58321 | -1.10744 | O                          | -4.76506 | -1.89216 | -1.28930 | O                          | -4.66131 | -1.97152 | -1.34933 |

| Conformer 10               |          |          |          | Conformer 11               |          |          |          |
|----------------------------|----------|----------|----------|----------------------------|----------|----------|----------|
| Relative energy (kcal/mol) |          |          | 1.62     | Relative energy (kcal/mol) |          |          | 1.68     |
| Population (%)             |          |          | 1.5      | Population (%)             |          |          | 1.3      |
| C                          | -0.49020 | -1.26136 | 1.00801  | C                          | -0.49127 | -1.25839 | 1.01136  |
| C                          | -1.47724 | -0.14140 | 1.32118  | C                          | -1.47671 | -0.13624 | 1.32180  |
| C                          | -0.65503 | 1.14435  | 1.02912  | C                          | -0.65297 | 1.14775  | 1.02611  |
| C                          | -1.49288 | 2.37088  | 0.74874  | C                          | -1.48956 | 2.37435  | 0.74218  |
| C                          | -2.79752 | 2.27760  | 0.48387  | C                          | -2.79425 | 2.28173  | 0.47729  |
| C                          | -3.57105 | 0.99448  | 0.41278  | C                          | -3.56924 | 0.99929  | 0.40985  |
| C                          | -4.60093 | 0.99673  | -0.72939 | C                          | -4.59894 | 0.99920  | -0.73252 |
| C                          | -5.44867 | -0.28081 | -0.74696 | C                          | -5.44808 | -0.27747 | -0.74637 |
| C                          | -4.54533 | -1.51977 | -0.77593 | C                          | -4.54614 | -1.51753 | -0.77128 |
| C                          | -3.49514 | -1.51526 | 0.34090  | C                          | -3.49618 | -1.51069 | 0.34573  |
| C                          | -2.65486 | -0.23365 | 0.29044  | C                          | -2.65445 | -0.23020 | 0.29137  |
| C                          | -1.94826 | -0.22844 | 2.77463  | C                          | -1.94767 | -0.21867 | 2.77552  |
| C                          | 0.34760  | 0.75945  | -0.10541 | C                          | 0.34943  | 0.75852  | -0.10719 |
| C                          | 1.74276  | 1.42555  | -0.04744 | C                          | 1.74612  | 1.42179  | -0.05057 |
| C                          | 2.15915  | 2.12770  | -1.33401 | C                          | 2.16357  | 2.12265  | -1.33760 |
| C                          | 3.56921  | 2.68884  | -1.32934 | C                          | 3.57469  | 2.68094  | -1.33179 |
| C                          | 3.97827  | 3.56413  | -0.17377 | C                          | 3.98206  | 3.56067  | -0.17891 |
| C                          | -0.79865 | 3.70264  | 0.83062  | C                          | -0.79400 | 3.70560  | 0.82072  |
| C                          | -6.44524 | -0.28044 | -1.90479 | C                          | -6.44434 | -0.27967 | -1.90446 |
| C                          | 0.82504  | -1.59039 | -1.13420 | C                          | 0.82258  | -1.59346 | -1.13109 |
| C                          | 0.63955  | -0.72762 | 0.12050  | C                          | 0.63895  | -0.72827 | 0.12248  |
| C                          | 2.04498  | -0.76556 | 0.75608  | C                          | 2.04479  | -0.76780 | 0.75767  |
| C                          | 2.68925  | -2.06578 | 0.23393  | C                          | 2.68175  | -2.07228 | 0.23781  |
| C                          | 4.20770  | -1.98752 | 0.10617  | C                          | 4.19554  | -2.00940 | 0.11445  |
| C                          | 2.37133  | -3.32036 | -1.96288 | C                          | 2.36562  | -3.32711 | -1.95876 |
| H                          | -0.05578 | 1.35395  | 1.92220  | H                          | -0.05368 | 1.35931  | 1.91873  |
| H                          | -3.36686 | 3.19122  | 0.32706  | H                          | -3.36254 | 3.19554  | 0.31778  |
| H                          | -4.14606 | 0.89846  | 1.34513  | H                          | -4.14453 | 0.90674  | 1.34239  |
| H                          | -5.25096 | 1.87188  | -0.62911 | H                          | -5.24803 | 1.87536  | -0.63505 |
| H                          | -4.07732 | 1.10030  | -1.68779 | H                          | -4.07502 | 1.09926  | -1.69113 |
| H                          | -6.01867 | -0.30841 | 0.19090  | H                          | -6.01836 | -0.30156 | 0.19142  |
| H                          | -5.15719 | -2.42417 | -0.70332 | H                          | -5.15902 | -2.42102 | -0.69594 |
| H                          | -2.85905 | -2.39696 | 0.24546  | H                          | -2.86110 | -2.39342 | 0.25325  |
| H                          | -3.99778 | -1.59248 | 1.30990  | H                          | -3.99911 | -1.58426 | 1.31487  |
| H                          | -2.20215 | -0.18780 | -0.70697 | H                          | -2.20165 | -0.18794 | -0.70617 |
| H                          | -0.11504 | 0.91706  | -1.07900 | H                          | -0.11263 | 0.91456  | -1.08132 |
| H                          | 1.79674  | 2.11748  | 0.79533  | H                          | 1.80166  | 2.11418  | 0.79183  |
| H                          | 2.06423  | 1.44741  | -2.18138 | H                          | 2.06806  | 1.44179  | -2.18444 |
| H                          | 1.47901  | 2.97080  | -1.49622 | H                          | 1.48488  | 2.96671  | -1.50060 |
| H                          | 2.44692  | -2.86821 | 0.93986  | H                          | 2.43488  | -2.87035 | 0.94615  |
| H                          | -4.03652 | -1.56424 | -1.74672 | H                          | -4.03719 | -1.56565 | -1.74183 |
| H                          | 4.60800  | -2.92324 | -0.28835 | H                          | 4.58441  | -2.95460 | -0.27424 |
| H                          | 4.49570  | -1.17696 | -0.56106 | H                          | 4.49587  | -1.20076 | -0.55433 |
| H                          | 2.93081  | -0.80194 | 2.45769  | H                          | 2.93122  | -0.83913 | 2.45673  |
| H                          | 4.89610  | -2.53128 | 1.86514  | H                          | 5.61207  | -1.55332 | 1.40181  |
| H                          | -1.09603 | -0.16479 | 3.45425  | H                          | -2.62718 | 0.59981  | 3.01503  |
| H                          | -2.62867 | 0.58861  | 3.01638  | H                          | -2.46240 | -1.15831 | 2.97444  |
| H                          | -2.46200 | -1.16919 | 2.97085  | H                          | -1.09531 | -0.15409 | 3.45489  |
| H                          | 4.12104  | 2.94862  | 0.71894  | H                          | 3.20423  | 4.29266  | 0.04857  |
| H                          | 3.19944  | 4.29319  | 0.05972  | H                          | 4.91860  | 4.06669  | -0.40742 |
| H                          | 4.91283  | 4.07340  | -0.40313 | H                          | 4.12017  | 2.94900  | 0.71719  |
| H                          | -1.50106 | 4.52236  | 0.67192  | H                          | 0.00143  | 3.79377  | 0.07551  |
| H                          | -0.32681 | 3.83948  | 1.80904  | H                          | -1.49533 | 4.52560  | 0.65873  |
| H                          | -0.00419 | 3.79399  | 0.08472  | H                          | -0.32317 | 3.84489  | 1.79929  |
| H                          | -7.10877 | 0.58739  | -1.85816 | H                          | -7.10696 | 0.58901  | -1.86079 |
| H                          | -7.06950 | -1.17804 | -1.89063 | H                          | -7.06956 | -1.17657 | -1.88761 |
| H                          | -5.92655 | -0.25149 | -2.86796 | H                          | -5.92536 | -0.25438 | -2.86758 |
| H                          | 3.31315  | -3.07125 | -2.45471 | H                          | 2.47011  | -4.28540 | -1.44427 |
| H                          | 2.48483  | -4.27708 | -1.44730 | H                          | 1.59067  | -3.41144 | -2.71681 |
| H                          | 1.59313  | -3.41144 | -2.71686 | H                          | 3.31160  | -3.08303 | -2.44516 |
| N                          | 1.98009  | -2.28713 | -1.02283 | N                          | 1.97638  | -2.29244 | -1.01961 |
| O                          | -0.56317 | -2.40583 | 1.38743  | O                          | -0.56595 | -2.40186 | 1.39333  |
| O                          | 2.68761  | 0.35148  | 0.18711  | O                          | 2.68898  | 0.34625  | 0.18392  |
| O                          | 4.33045  | 2.45518  | -2.24859 | O                          | 4.33845  | 2.44132  | -2.24744 |
| O                          | 0.03779  | -1.64144 | -2.06847 | O                          | 0.03511  | -1.64435 | -2.06509 |
| O                          | 2.01591  | -0.68717 | 2.15436  | O                          | 2.02069  | -0.68826 | 2.15529  |
| O                          | 4.77659  | -1.69856 | 1.39027  | O                          | 4.67596  | -1.78367 | 1.44633  |



**Table S3.** Isotropic shieldings of significantly populated conformers of compound **1**, average isotropic shieldings over conformers, linearly scaled calculated chemical shifts, experimental chemical shifts, and errors.

| Atom                            | Isotropic shieldings |       |       |       |       |       |       |       |       |       |         | Chemical shifts |       |        |
|---------------------------------|----------------------|-------|-------|-------|-------|-------|-------|-------|-------|-------|---------|-----------------|-------|--------|
|                                 | 1                    | 2     | 3     | 4     | 5     | 6     | 7     | 8     | 9     | 10    | Average | Calcd.          | Exp.  | Errors |
| C-1                             | -37.0                | -32.5 | -36.8 | -39.2 | -33.0 | -36.7 | -38.8 | -32.7 | -36.5 | -31.3 | -36.1   | 215.1           | 213.2 | 1.9    |
| C-2                             | 125.4                | 126.7 | 125.4 | 125.8 | 126.8 | 125.7 | 125.8 | 126.8 | 126.0 | 126.8 | 125.8   | 58.9            | 56.4  | 2.5    |
| C-3                             | 128.8                | 129.0 | 128.6 | 128.9 | 129.0 | 126.5 | 128.8 | 128.9 | 126.4 | 128.2 | 128.6   | 56.2            | 54.8  | 1.4    |
| C-4                             | 46.0                 | 45.3  | 47.0  | 45.5  | 45.2  | 46.8  | 46.3  | 46.0  | 47.7  | 46.2  | 46.0    | 135.9           | 133.2 | 2.7    |
| C-5                             | 51.9                 | 52.4  | 51.0  | 52.4  | 52.5  | 51.4  | 51.5  | 51.5  | 50.4  | 51.6  | 51.9    | 130.2           | 128.0 | 2.2    |
| C-6                             | 146.3                | 146.4 | 146.3 | 146.6 | 146.4 | 146.5 | 146.5 | 146.2 | 146.5 | 146.5 | 146.4   | 39.1            | 37.7  | 1.4    |
| C-7                             | 143.5                | 143.4 | 143.6 | 143.5 | 143.4 | 143.7 | 143.5 | 143.4 | 143.7 | 143.5 | 143.5   | 41.8            | 42.9  | -1.1   |
| C-8                             | 151.2                | 151.2 | 151.1 | 151.3 | 151.2 | 151.3 | 151.2 | 151.0 | 151.1 | 151.2 | 151.2   | 34.4            | 33.5  | 0.9    |
| C-9                             | 150.7                | 150.6 | 150.7 | 150.7 | 150.6 | 150.8 | 150.7 | 150.5 | 150.8 | 150.7 | 150.7   | 34.9            | 36.0  | -1.1   |
| C-10                            | 160.2                | 160.3 | 160.2 | 160.4 | 160.3 | 160.3 | 160.5 | 160.4 | 160.3 | 160.4 | 160.3   | 25.7            | 25.8  | -0.1   |
| C-11                            | 148.3                | 147.4 | 148.4 | 147.4 | 147.4 | 148.4 | 147.7 | 147.6 | 148.3 | 147.6 | 148.0   | 37.5            | 37.9  | -0.4   |
| C-12                            | 172.7                | 172.8 | 172.7 | 172.8 | 172.7 | 172.2 | 172.9 | 172.8 | 172.1 | 172.4 | 172.7   | 13.7            | 14.2  | -0.5   |
| C-13                            | 127.1                | 128.0 | 126.2 | 128.6 | 127.9 | 127.8 | 127.6 | 127.0 | 127.0 | 128.3 | 127.4   | 57.3            | 57.0  | 0.3    |
| C-14                            | 100.7                | 102.0 | 97.4  | 100.1 | 102.1 | 101.2 | 97.1  | 99.2  | 97.8  | 99.3  | 100.3   | 83.5            | 83.7  | -0.2   |
| C-15                            | 137.2                | 137.1 | 133.2 | 137.0 | 137.1 | 136.8 | 133.0 | 133.1 | 132.7 | 137.4 | 136.3   | 48.8            | 50.3  | -1.5   |
| C-16                            | -24.2                | -24.1 | -24.1 | -23.6 | -24.0 | -23.9 | -24.5 | -24.7 | -23.7 | -24.3 | -24.1   | 203.5           | 206.8 | -3.3   |
| C-17                            | 155.8                | 155.6 | 159.4 | 155.7 | 155.6 | 155.8 | 159.3 | 159.3 | 159.5 | 155.7 | 156.5   | 29.3            | 30.8  | -1.5   |
| C-18                            | 161.6                | 161.7 | 161.5 | 161.7 | 161.7 | 161.7 | 161.6 | 161.5 | 161.6 | 161.8 | 161.6   | 24.4            | 23.2  | 1.2    |
| C-19                            | 164.4                | 164.4 | 164.5 | 164.5 | 164.4 | 164.5 | 164.5 | 164.5 | 164.5 | 164.4 | 164.4   | 21.7            | 22.5  | -0.8   |
| C-2'                            | 14.2                 | 11.8  | 14.8  | 12.8  | 11.7  | 14.1  | 13.6  | 12.4  | 14.8  | 13.5  | 13.5    | 167.2           | 170.2 | -3.0   |
| C-3'                            | 107.0                | 106.2 | 107.1 | 104.1 | 106.0 | 105.9 | 104.3 | 106.2 | 106.2 | 106.3 | 106.3   | 77.8            | 75.3  | 2.5    |
| C-4'                            | 72.7                 | 72.6  | 72.5  | 71.1  | 72.6  | 72.3  | 71.0  | 72.3  | 71.7  | 71.7  | 72.3    | 110.5           | 110.3 | 0.2    |
| C-5'                            | 114.7                | 118.1 | 115.1 | 115.9 | 119.7 | 114.5 | 116.1 | 120.1 | 114.7 | 116.6 | 116.0   | 68.4            | 68.3  | 0.1    |
| C-6'                            | 126.6                | 123.1 | 126.6 | 126.4 | 123.5 | 127.5 | 126.4 | 123.3 | 127.4 | 124.2 | 125.8   | 58.9            | 60.4  | -1.5   |
| C-7'                            | 158.6                | 158.6 | 158.6 | 159.1 | 158.5 | 158.7 | 159.1 | 158.5 | 158.7 | 158.5 | 158.7   | 27.2            | 29.5  | -2.3   |
| H-3                             | 29.69                | 29.68 | 29.63 | 29.67 | 29.68 | 29.87 | 29.62 | 29.62 | 29.82 | 29.63 | 29.69   | 2.25            | 2.32  | -0.07  |
| H-5                             | 26.49                | 26.50 | 26.43 | 26.50 | 26.50 | 26.47 | 26.44 | 26.45 | 26.42 | 26.50 | 26.48   | 5.34            | 5.25  | 0.09   |
| H-6                             | 30.10                | 30.09 | 30.09 | 30.08 | 30.09 | 30.11 | 30.08 | 30.11 | 30.09 | 30.10 | 30.10   | 1.85            | 1.84  | 0.01   |
| H-7eq                           | 30.22                | 30.23 | 30.19 | 30.24 | 30.23 | 30.22 | 30.19 | 30.19 | 30.19 | 30.23 | 30.22   | 1.74            | 1.82  | -0.08  |
| H-7ax                           | 31.18                | 31.20 | 31.17 | 31.19 | 31.20 | 31.17 | 31.19 | 31.21 | 31.17 | 31.20 | 31.18   | 0.80            | 0.75  | 0.05   |
| H-8                             | 30.57                | 30.58 | 30.55 | 30.57 | 30.58 | 30.57 | 30.56 | 30.56 | 30.55 | 30.58 | 30.57   | 1.40            | 1.44  | -0.04  |
| H-9eq                           | 30.39                | 30.41 | 30.36 | 30.39 | 30.41 | 30.39 | 30.38 | 30.39 | 30.35 | 30.41 | 30.39   | 1.57            | 1.71  | -0.14  |
| H-9ax                           | 31.08                | 31.15 | 31.09 | 31.13 | 31.15 | 31.08 | 31.13 | 31.15 | 31.09 | 31.14 | 31.11   | 0.88            | 0.83  | 0.05   |
| H-10eq                          | 30.78                | 30.70 | 30.79 | 30.73 | 30.71 | 30.77 | 30.75 | 30.74 | 30.77 | 30.71 | 30.75   | 1.22            | 1.29  | -0.07  |
| H-10ax                          | 30.98                | 31.02 | 30.98 | 31.00 | 31.03 | 30.98 | 31.02 | 31.04 | 30.97 | 31.02 | 31.00   | 0.99            | 1.02  | -0.03  |
| H-11                            | 30.20                | 30.49 | 30.25 | 30.42 | 30.48 | 30.18 | 30.38 | 30.48 | 30.27 | 30.47 | 30.31   | 1.65            | 1.48  | 0.17   |
| H-13                            | 29.31                | 29.40 | 29.30 | 29.31 | 29.40 | 29.30 | 29.29 | 29.39 | 29.28 | 29.34 | 29.33   | 2.59            | 2.67  | -0.08  |
| H-14                            | 26.89                | 26.91 | 26.94 | 26.82 | 26.91 | 26.88 | 26.87 | 26.97 | 26.91 | 26.75 | 26.89   | 4.94            | 4.90  | 0.04   |
| H-15a                           | 29.06                | 29.17 | 29.65 | 29.10 | 29.16 | 29.07 | 29.65 | 29.73 | 29.68 | 29.10 | 29.21   | 2.70            | 2.70  | 0.00   |
| H-15b                           | 29.41                | 29.50 | 29.12 | 29.44 | 29.50 | 29.43 | 29.13 | 29.17 | 29.17 | 29.44 | 29.38   | 2.55            | 2.52  | 0.03   |
| H-5'                            | 28.60                | 28.64 | 28.57 | 28.49 | 28.52 | 28.56 | 28.49 | 28.49 | 28.53 | 28.61 | 28.57   | 3.32            | 3.44  | -0.12  |
| H-6'a                           | 28.19                | 28.00 | 28.19 | 27.79 | 27.79 | 28.23 | 27.78 | 27.78 | 28.24 | 27.82 | 28.06   | 3.81            | 3.86  | -0.05  |
| H-6'b                           | 28.06                | 27.85 | 28.08 | 28.28 | 27.84 | 27.88 | 28.27 | 27.84 | 27.88 | 28.31 | 28.03   | 3.84            | 3.79  | 0.05   |
| H <sub>3</sub> -12 <sup>b</sup> | 31.02                | 31.03 | 31.01 | 31.02 | 31.03 | 31.02 | 31.02 | 31.03 | 31.01 | 31.01 | 31.02   | 0.96            | 0.88  | 0.08   |
| H <sub>3</sub> -17 <sup>b</sup> | 29.75                | 29.76 | 29.65 | 29.75 | 29.76 | 29.75 | 29.61 | 29.63 | 29.65 | 29.75 | 29.73   | 2.20            | 2.09  | 0.11   |
| H <sub>3</sub> -18 <sup>b</sup> | 30.25                | 30.26 | 30.10 | 30.24 | 30.26 | 30.25 | 30.10 | 30.11 | 30.10 | 30.26 | 30.22   | 1.73            | 1.76  | -0.03  |
| H <sub>3</sub> -19 <sup>b</sup> | 31.05                | 31.06 | 31.04 | 31.06 | 31.06 | 31.05 | 31.05 | 31.06 | 31.04 | 31.06 | 31.05   | 0.93            | 0.89  | 0.04   |
| H <sub>3</sub> -7' <sup>b</sup> | 29.03                | 29.06 | 29.04 | 29.06 | 29.05 | 29.02 | 29.06 | 29.06 | 29.03 | 29.05 | 29.04   | 2.87            | 2.86  | 0.01   |

<sup>a</sup> Isotropic shieldings for <sup>13</sup>C were calculated at the mPW1PW91/6-311+G(2d,p) level; isotropic shielding for <sup>1</sup>H were calculated at the WP04/aug-cc-pVDZ/PCM(ACN) level.

<sup>b</sup> Isotropic shieldings of methyl protons are the arithmetic mean of the shieldings of the three protons of each methyl group.

**Table S4.** Isotropic shieldings of significantly populated conformers of compound 5'-*epi*-1, average isotropic shieldings over conformers, linearly scaled calculated chemical shifts, experimental chemical shifts, and errors.

| Atom                            | Isotropic shieldings <sup>a</sup> |       |       |       |       |       |       |       |       |       |       |         | Chemical shifts |       |        |       |
|---------------------------------|-----------------------------------|-------|-------|-------|-------|-------|-------|-------|-------|-------|-------|---------|-----------------|-------|--------|-------|
|                                 | 1                                 | 2     | 3     | 4     | 5     | 6     | 7     | 8     | 9     | 10    | 11    | Average | Calcd.          | Exp.  | Errors |       |
| C-1                             | -30.9                             | -30.6 | -36.7 | -30.4 | -30.6 | -36.9 | -30.8 | -31.4 | -31.1 | -31.2 | -30.9 | -32.0   | 211.7           | 213.2 | -1.5   |       |
| C-2                             | 127.0                             | 127.6 | 126.3 | 128.5 | 127.6 | 125.5 | 127.0 | 126.7 | 126.8 | 126.8 | 126.8 | 127.1   | 57.9            | 56.4  | 1.5    |       |
| C-3                             | 129.1                             | 129.0 | 128.8 | 127.3 | 126.7 | 128.7 | 129.1 | 129.2 | 129.2 | 129.1 | 129.1 | 128.6   | 56.5            | 54.8  | 1.7    |       |
| C-4                             | 46.2                              | 47.1  | 47.1  | 47.9  | 47.0  | 46.6  | 45.7  | 45.2  | 45.3  | 46.3  | 46.3  | 46.7    | 135.5           | 133.2 | 2.3    |       |
| C-5                             | 51.8                              | 50.7  | 51.0  | 50.0  | 51.1  | 51.7  | 52.0  | 52.4  | 52.3  | 51.6  | 51.5  | 51.2    | 131.2           | 128.0 | 3.2    |       |
| C-6                             | 146.2                             | 146.4 | 146.6 | 146.7 | 146.6 | 146.5 | 146.4 | 146.3 | 146.3 | 146.2 | 146.2 | 146.4   | 39.2            | 37.7  | 1.5    |       |
| C-7                             | 143.5                             | 143.6 | 143.8 | 143.6 | 143.6 | 143.8 | 143.3 | 143.2 | 143.2 | 143.4 | 143.4 | 143.6   | 42.0            | 42.9  | -0.9   |       |
| C-8                             | 151.2                             | 151.1 | 151.1 | 151.1 | 151.3 | 151.1 | 151.2 | 151.2 | 151.1 | 151.0 | 151.0 | 151.2   | 34.7            | 33.5  | 1.2    |       |
| C-9                             | 150.4                             | 150.5 | 150.8 | 150.5 | 150.5 | 150.8 | 150.4 | 150.4 | 150.4 | 150.3 | 150.3 | 150.5   | 35.3            | 36.0  | -0.7   |       |
| C-10                            | 160.4                             | 160.4 | 159.9 | 160.5 | 160.5 | 159.8 | 160.5 | 160.5 | 160.4 | 160.3 | 160.3 | 160.3   | 25.8            | 25.8  | 0.0    |       |
| C-11                            | 147.3                             | 147.5 | 148.8 | 147.2 | 147.3 | 148.7 | 147.4 | 147.5 | 147.5 | 147.5 | 147.5 | 147.7   | 38.0            | 37.9  | 0.1    |       |
| C-12                            | 172.8                             | 172.7 | 173.0 | 172.0 | 172.2 | 173.1 | 172.9 | 173.0 | 173.0 | 172.9 | 172.9 | 172.7   | 13.8            | 14.2  | -0.4   |       |
| C-13                            | 129.0                             | 127.2 | 127.4 | 128.2 | 129.9 | 129.4 | 128.6 | 128.2 | 128.2 | 127.4 | 127.4 | 128.3   | 56.7            | 57.0  | -0.3   |       |
| C-14                            | 100.3                             | 98.2  | 97.2  | 99.0  | 100.5 | 98.7  | 101.1 | 101.7 | 101.9 | 98.6  | 98.7  | 99.3    | 84.8            | 83.7  | 1.1    |       |
| C-15                            | 137.1                             | 137.0 | 136.6 | 137.3 | 136.8 | 136.9 | 137.0 | 137.3 | 137.1 | 133.2 | 133.2 | 136.9   | 48.4            | 50.3  | -1.9   |       |
| C-16                            | -24.3                             | -28.0 | -28.3 | -28.6 | -24.2 | -23.5 | -24.7 | -23.9 | -24.3 | -24.8 | -25.2 | -26.1   | 205.9           | 206.8 | -0.9   |       |
| C-17                            | 156.1                             | 156.6 | 156.7 | 156.4 | 156.0 | 156.1 | 156.0 | 155.9 | 155.9 | 159.3 | 159.3 | 156.4   | 29.6            | 30.8  | -1.2   |       |
| C-18                            | 161.7                             | 161.8 | 161.9 | 161.7 | 161.8 | 161.8 | 161.6 | 161.6 | 161.7 | 161.5 | 161.5 | 161.7   | 24.4            | 23.2  | 1.2    |       |
| C-19                            | 164.3                             | 164.4 | 164.5 | 164.5 | 164.4 | 164.4 | 164.4 | 164.4 | 164.4 | 164.5 | 164.4 | 164.4   | 21.9            | 22.5  | -0.6   |       |
| C-2'                            | 12.9                              | 13.4  | 13.9  | 13.5  | 13.0  | 13.4  | 12.7  | 11.7  | 11.6  | 12.5  | 12.3  | 13.1    | 168.0           | 170.2 | -2.2   |       |
| C-3'                            | 106.7                             | 106.6 | 104.9 | 106.1 | 105.8 | 104.7 | 106.6 | 106.6 | 106.8 | 106.8 | 107.0 | 106.1   | 78.2            | 75.3  | 2.9    |       |
| C-4'                            | 71.4                              | 71.9  | 71.7  | 70.1  | 70.0  | 71.4  | 72.9  | 73.5  | 73.6  | 73.0  | 73.1  | 71.5    | 111.6           | 110.3 | 1.3    |       |
| C-5'                            | 119.0                             | 116.7 | 114.5 | 118.3 | 120.9 | 117.1 | 119.8 | 119.3 | 121.7 | 119.4 | 121.6 | 118.0   | 66.7            | 68.3  | -1.6   |       |
| C-6'                            | 127.5                             | 128.0 | 127.9 | 127.9 | 126.9 | 127.1 | 121.7 | 123.3 | 123.4 | 123.3 | 123.3 | 127.0   | 58.0            | 60.4  | -2.4   |       |
| C-7'                            | 160.3                             | 159.9 | 159.7 | 159.6 | 160.1 | 160.2 | 159.9 | 160.0 | 160.0 | 159.9 | 159.9 | 160.0   | 26.1            | 29.5  | -3.4   |       |
| H-3                             | 29.60                             | 29.65 | 29.73 | 29.85 | 29.82 | 29.72 | 29.65 | 29.65 | 29.65 | 29.58 | 29.59 | 29.69   | 2.24            | 2.32  | -0.08  |       |
| H-5                             | 26.47                             | 26.45 | 26.46 | 26.42 | 26.44 | 26.47 | 26.48 | 26.50 | 26.50 | 26.46 | 26.46 | 26.46   | 5.35            | 5.25  | 0.10   |       |
| H-6                             | 30.09                             | 30.10 | 30.13 | 30.10 | 30.09 | 30.14 | 30.12 | 30.13 | 30.12 | 30.13 | 30.13 | 30.11   | 1.84            | 1.84  | 0.00   |       |
| H-7eq                           | 30.22                             | 30.21 | 30.20 | 30.21 | 30.21 | 30.20 | 30.21 | 30.21 | 30.21 | 30.20 | 30.21 | 30.21   | 30.21           | 1.74  | 1.82   | -0.08 |
| H-7ax                           | 31.18                             | 31.17 | 31.13 | 31.19 | 31.19 | 31.13 | 31.21 | 31.22 | 31.22 | 31.21 | 31.21 | 31.17   | 0.81            | 0.75  | 0.06   |       |
| H-8                             | 30.57                             | 30.56 | 30.56 | 30.56 | 30.57 | 30.57 | 30.57 | 30.57 | 30.57 | 30.55 | 30.55 | 30.57   | 1.40            | 1.44  | -0.04  |       |
| H-9eq                           | 30.37                             | 30.34 | 30.36 | 30.33 | 30.37 | 30.38 | 30.38 | 30.38 | 30.38 | 30.34 | 30.33 | 30.36   | 1.60            | 1.71  | -0.11  |       |
| H-9ax                           | 31.12                             | 31.14 | 31.11 | 31.14 | 31.13 | 31.10 | 31.14 | 31.14 | 31.14 | 31.13 | 31.13 | 31.13   | 0.86            | 0.83  | 0.03   |       |
| H-10eq                          | 30.69                             | 30.69 | 30.84 | 30.65 | 30.68 | 30.87 | 30.74 | 30.74 | 30.73 | 30.76 | 30.76 | 30.73   | 1.25            | 1.29  | -0.04  |       |
| H-10ax                          | 31.00                             | 30.98 | 30.97 | 30.98 | 30.99 | 30.98 | 31.03 | 31.03 | 31.03 | 31.01 | 31.01 | 30.99   | 0.99            | 1.02  | -0.03  |       |
| H-11                            | 30.54                             | 30.64 | 30.37 | 30.66 | 30.57 | 30.28 | 30.48 | 30.47 | 30.48 | 30.54 | 30.54 | 30.53   | 1.44            | 1.48  | -0.04  |       |
| H-13                            | 29.35                             | 29.30 | 29.30 | 29.30 | 29.35 | 29.33 | 29.39 | 29.40 | 29.40 | 29.35 | 29.35 | 29.33   | 2.59            | 2.67  | -0.08  |       |
| H-14                            | 26.81                             | 27.30 | 27.28 | 27.28 | 26.76 | 26.77 | 26.85 | 26.86 | 26.86 | 26.90 | 26.91 | 27.03   | 4.80            | 4.90  | -0.10  |       |
| H-15a                           | 29.30                             | 28.92 | 28.92 | 29.05 | 29.35 | 29.28 | 29.34 | 29.40 | 29.39 | 29.13 | 29.12 | 29.15   | 2.77            | 2.70  | 0.07   |       |
| H-15b                           | 29.02                             | 29.87 | 29.84 | 29.88 | 29.04 | 29.01 | 29.03 | 29.08 | 29.08 | 29.67 | 29.67 | 29.44   | 2.49            | 2.52  | -0.03  |       |
| H-5'                            | 28.37                             | 28.41 | 28.65 | 28.47 | 28.44 | 28.61 | 28.10 | 28.20 | 28.14 | 28.19 | 28.12 | 28.42   | 3.46            | 3.44  | 0.02   |       |
| H-6'a                           | 27.92                             | 27.95 | 27.87 | 27.85 | 27.82 | 27.85 | 28.06 | 27.84 | 27.83 | 27.85 | 27.83 | 27.90   | 3.97            | 3.86  | 0.11   |       |
| H-6'b                           | 28.20                             | 28.22 | 28.24 | 28.23 | 28.21 | 28.24 | 28.27 | 28.23 | 28.01 | 28.26 | 28.05 | 28.21   | 3.66            | 3.79  | -0.13  |       |
| H <sub>3</sub> -12 <sup>b</sup> | 31.06                             | 31.05 | 31.05 | 31.06 | 31.05 | 31.07 | 31.06 | 31.06 | 31.06 | 31.04 | 31.04 | 31.06   | 0.93            | 0.88  | 0.05   |       |
| H <sub>3</sub> -17 <sup>b</sup> | 29.76                             | 29.59 | 29.57 | 29.57 | 29.77 | 29.74 | 29.74 | 29.74 | 29.75 | 29.62 | 29.62 | 29.67   | 2.26            | 2.09  | 0.17   |       |
| H <sub>3</sub> -18 <sup>b</sup> | 30.26                             | 30.12 | 30.12 | 30.11 | 30.25 | 30.27 | 30.24 | 30.24 | 30.24 | 30.08 | 30.08 | 30.19   | 1.77            | 1.76  | 0.01   |       |
| H <sub>3</sub> -19 <sup>b</sup> | 31.04                             | 31.04 | 31.05 | 31.04 | 31.04 | 31.04 | 31.05 | 31.05 | 31.05 | 31.05 | 31.05 | 31.04   | 0.94            | 0.89  | 0.05   |       |
| H <sub>3</sub> -7' <sup>b</sup> | 28.96                             | 28.94 | 28.95 | 28.93 | 28.96 | 28.99 | 29.14 | 29.15 | 29.14 | 29.14 | 29.13 | 28.98   | 2.93            | 2.86  | 0.07   |       |

<sup>a</sup> Isotropic shieldings for <sup>13</sup>C were calculated at the mPW1PW91/6-311+G(2d,p) level; isotropic shielding for <sup>1</sup>H were calculated at the WP04/aug-cc-pVDZ/PCM(ACN) level.

<sup>b</sup> Isotropic shieldings of methyl protons are the arithmetic mean of the shieldings of the three protons of each methyl group.

**Table S5.** Selected coupling constants of compounds **1** and 5'-*epi*-**1** calculated at the B3LYP/6-31G(d,p) level and relative intensities of the corresponding HMBC peaks.

| Compound <b>1</b>            |            |            |            |             |            |            |
|------------------------------|------------|------------|------------|-------------|------------|------------|
| Conformer                    | Population | H-5'/C-2'  | H-5'/C-3'  | H-5'/C-4'   | H-5'/C-6'  | H-5'/C-7'  |
| 1                            | 38.7%      | 4.8        | 1.7        | -5.3        | 4.0        | 0.9        |
| 2                            | 13.0%      | 3.7        | 1.6        | -4.7        | -2.3       | 1.5        |
| 3                            | 11.1%      | 4.8        | 1.7        | -5.4        | 4.0        | 0.9        |
| 4                            | 10.8%      | 2.7        | 1.2        | -5.6        | 4.4        | 1.8        |
| 5                            | 8.2%       | 3.8        | 1.7        | -4.8        | -3.1       | 1.5        |
| 6                            | 7.5%       | 5.5        | 1.5        | -5.9        | 3.2        | 0.8        |
| 7                            | 4.1%       | 2.6        | 1.2        | -5.7        | 4.4        | 1.8        |
| 8                            | 3.3%       | 3.8        | 1.7        | -4.9        | -3.2       | 1.5        |
| 9                            | 2.2%       | 5.6        | 1.5        | -5.9        | 3.2        | 0.8        |
| 10                           | 1.2%       | 4.6        | 2.2        | -5.1        | -2.9       | 1.4        |
| <b>Average coupling (Hz)</b> |            | <b>4.3</b> | <b>1.6</b> | <b>-5.3</b> | <b>2.2</b> | <b>1.2</b> |

  

| Compound 5'- <i>epi</i> - <b>1</b> |            |            |             |             |            |            |
|------------------------------------|------------|------------|-------------|-------------|------------|------------|
| Conformer                          | Population | H-5'/C-2'  | H-5'/C-3'   | H-5'/C-4'   | H-5'/C-6'  | H-5'/C-7'  |
| 1                                  | 22.7%      | 0.4        | -0.2        | -2.7        | 3.8        | 0.0        |
| 2                                  | 21.0%      | 0.8        | -0.3        | -2.6        | 3.9        | 0.2        |
| 3                                  | 13.1%      | 0.9        | -0.4        | -2.2        | 2.9        | 0.2        |
| 4                                  | 12.4%      | 0.8        | -0.4        | -2.8        | 2.8        | 0.2        |
| 5                                  | 8.5%       | 0.4        | -0.3        | -2.7        | 3.0        | 0.1        |
| 6                                  | 8.4%       | 0.5        | -0.3        | -2.2        | 3.0        | 0.1        |
| 7                                  | 3.9%       | 0.7        | -0.2        | -2.4        | -0.5       | 0.4        |
| 8                                  | 3.8%       | 0.2        | -0.1        | -2.2        | -2.5       | 0.2        |
| 9                                  | 3.4%       | 0.2        | -0.1        | -2.3        | -3.0       | 0.2        |
| 10                                 | 1.5%       | 0.2        | -0.1        | -2.1        | -2.6       | 0.2        |
| 11                                 | 1.3%       | 0.2        | -0.1        | -2.1        | -3.1       | 0.2        |
| <b>Average coupling (Hz)</b>       |            | <b>0.6</b> | <b>-0.3</b> | <b>-2.5</b> | <b>2.6</b> | <b>0.2</b> |

  

| HMBC experiment (optimized for $J_{CH} = 8$ Hz) |              |              |              |              |              |
|-------------------------------------------------|--------------|--------------|--------------|--------------|--------------|
| Relative peak intensity                         | H-5'/C-2'    | H-5'/C-3'    | H-5'/C-4'    | H-5'/C-6'    | H-5'/C-7'    |
|                                                 | <b>0.822</b> | <b>0.149</b> | <b>1.000</b> | <b>0.177</b> | <b>0.072</b> |

**Table S6.** Bioactivity of Kupchan subextracts (KM, KC, KH) and C18 SPE fractions (F0-F10) obtained from *Pyrenochaetopsis* FVE-087 against cancer cell lines (A-375, A-549, HT-29, HCT-116, MB-231) and HaCaT cells. The activity is expressed as % inhibition at 100 µg/mL test concentration. Reference compound: Doxorubicin.

| <b>Sample</b>    | <b>A-375</b> | <b>A-54</b> | <b>HT-29</b> | <b>HCT-116</b> | <b>MB-231</b> | <b>HaCaT</b> |
|------------------|--------------|-------------|--------------|----------------|---------------|--------------|
| <b>KM</b>        | 0            | 0           | 0            | 0              | 0             | 0            |
| <b>KC</b>        | 99           | 99          | 84           | 99             | 99            | 98           |
| <b>KH</b>        | 69           | 35          | 99           | 34             | 0             | 64           |
| <b>F0</b>        | 0            | 0           | 0            | 0              | 0             | 0            |
| <b>F1</b>        | 0            | 0           | 0            | 0              | 0             | 0            |
| <b>F2</b>        | 0            | 0           | 0            | 0              | 0             | 0            |
| <b>F3</b>        | 0            | 0           | 0            | 0              | 0             | 0            |
| <b>F4</b>        | 0            | 0           | 0            | 0              | 23            | 0            |
| <b>F5</b>        | 0            | 0           | 0            | 0              | 43            | 20           |
| <b>F6</b>        | 43           | 0           | 0            | 0              | 33            | 45           |
| <b>F7</b>        | <b>98</b>    | 99          | 99           | 99             | 99            | 98           |
| <b>F8</b>        | <b>95</b>    | 49          | 74           | 67             | 68            | 78           |
| <b>F9</b>        | <b>98</b>    | 99          | 99           | 99             | 99            | 98           |
| <b>F10</b>       | 27           | 0           | 0            | 28             | 66            | 25           |
| <b>Reference</b> | 88           | 73          | 63           | 90             | 84            | 91           |
